# Supplementary material for: *K-means and cluster models for cancer signatures
Source: PubMed Central journal article supplement — Biomol Detect Quantif. 2017 Aug 2;13:7–31. doi: 10.1016/j.bdq.2017.07.001 (PMC5634820; doi:10.1016/j.bdq.2017.07.001), 2017-08-02
Supplement: mmc1.pdf [file mmc1.pdf]

## Supplementary Materials

Table S1: Genome data summary. All Brain Lower Glioma samples are Pilocytic Astrocytoma samples. See Subsection 3.1 for the data source definitions.

| Cancer Type                  | Total Counts | # of Samples | Source   |
|------------------------------|--------------|--------------|----------|
| B Cell Lymphoma              | 43626        | 24           | A1-2     |
| Bone Cancer                  | 36374        | 98           | B1       |
| Brain Lower Grade Glioma     | 3572         | 101          | A1, C1   |
| Breast Cancer                | 254381       | 119          | A1, D1   |
| Chronic Lymphocytic Leukemia | 19489        | 134          | A1, E1-2 |
| Esophageal Cancer            | 1064         | 17           | F1       |
| Gastric Cancer               | 1996615      | 100          | G1       |
| Liver Cancer                 | 3017487      | 389          | H1-2     |
| Lung Cancer                  | 449527       | 24           | I1       |
| Medulloblastoma              | 44689        | 100          | J1       |
| Ovarian Cancer               | 668918       | 84           | K1       |
| Pancreatic Cancer            | 5087         | 100          | L1       |
| Prostate Cancer              | 29142        | 5            | M1       |
| Renal Cell Carcinoma         | 483329       | 94           | N1       |
| All Cancer Types             | 7053300      | 1389         | Above    |

Table S2: Occurrence counts for the first 48 mutation categories for the genome data summarized in Table S1 aggregated by cancer types. X1 = B Cell Lymphoma, X2 = Bone Cancer, X3 = Brain Lower Grade Glioma, X4 = Breast Cancer, X5 = Chronic Lymphocytic Leukemia, X6 = Esophageal Cancer, X7 = Gastric Cancer, X8 = Liver Cancer, X9 = Lung Cancer, X10 = Medulloblastoma, X11 = Ovarian Cancer, X12 = Pancreatic Cancer, X13 = Prostate Cancer, X14 = Renal Cell Carcinoma. The mutations are encoded as follows: XYZW = Y > W: XYZ.

| Mutation | X1   | X2   | X3  | X4    | X5  | X6 | X7    | X8     | X9    | X10  | X11   | X12 | X13  | X14   |
|----------|------|------|-----|-------|-----|----|-------|--------|-------|------|-------|-----|------|-------|
| ACAA     | 466  | 716  | 59  | 3024  | 286 | 11 | 24884 | 51929  | 15865 | 801  | 13831 | 36  | 577  | 10734 |
| ACCA     | 355  | 528  | 41  | 2600  | 249 | 3  | 14361 | 15227  | 9217  | 681  | 11192 | 42  | 422  | 4952  |
| ACGA     | 43   | 112  | 6   | 446   | 55  | 4  | 2253  | 51156  | 3567  | 115  | 1804  | 9   | 59   | 1231  |
| ACTA     | 309  | 577  | 38  | 2201  | 195 | 12 | 15833 | 33385  | 10038 | 557  | 10508 | 20  | 380  | 5573  |
| CCAA     | 420  | 538  | 29  | 2814  | 238 | 11 | 21980 | 9507   | 19569 | 579  | 10943 | 59  | 459  | 7899  |
| CCCA     | 245  | 361  | 30  | 2149  | 147 | 6  | 19624 | 26869  | 16889 | 424  | 9720  | 45  | 336  | 6037  |
| CCGA     | 77   | 75   | 22  | 470   | 35  | 7  | 4034  | 8695   | 4995  | 105  | 1644  | 29  | 67   | 1069  |
| CCTA     | 418  | 502  | 26  | 2380  | 211 | 10 | 43418 | 2967   | 15930 | 544  | 10037 | 80  | 388  | 6825  |
| GCAA     | 452  | 624  | 41  | 2144  | 244 | 16 | 26007 | 42508  | 11084 | 532  | 6835  | 33  | 419  | 4795  |
| GCCA     | 234  | 346  | 18  | 1677  | 149 | 6  | 10594 | 32252  | 9087  | 337  | 6423  | 33  | 247  | 3563  |
| GCGA     | 67   | 66   | 7   | 375   | 29  | 5  | 2649  | 17426  | 3607  | 94   | 1295  | 17  | 67   | 853   |
| GCTA     | 351  | 463  | 13  | 1684  | 197 | 11 | 21205 | 33670  | 7502  | 345  | 6543  | 30  | 332  | 3637  |
| TCAA     | 584  | 628  | 38  | 5873  | 233 | 11 | 24288 | 33919  | 13358 | 766  | 9816  | 54  | 582  | 8973  |
| TCCA     | 313  | 472  | 36  | 3735  | 145 | 19 | 17372 | 139576 | 13140 | 567  | 9697  | 53  | 479  | 7388  |
| TCGA     | 66   | 57   | 7   | 543   | 28  | 4  | 3168  | 11569  | 2385  | 128  | 1334  | 17  | 87   | 1097  |
| TCTA     | 916  | 849  | 54  | 4938  | 376 | 25 | 43364 | 20943  | 14028 | 1111 | 12202 | 56  | 817  | 8611  |
| ACAG     | 232  | 260  | 19  | 2124  | 162 | 1  | 10057 | 42216  | 4369  | 445  | 8653  | 18  | 197  | 4551  |
| ACCG     | 143  | 148  | 11  | 1307  | 92  | 4  | 4818  | 6202   | 2088  | 256  | 4506  | 21  | 188  | 2687  |
| ACGG     | 48   | 82   | 10  | 641   | 32  | 2  | 1606  | 27957  | 953   | 121  | 2172  | 5   | 46   | 837   |
| ACTG     | 290  | 240  | 25  | 2278  | 113 | 8  | 8670  | 90212  | 3091  | 394  | 8460  | 23  | 237  | 4457  |
| CCAG     | 153  | 160  | 13  | 1726  | 78  | 7  | 4942  | 8975   | 3233  | 175  | 5559  | 30  | 125  | 2474  |
| CCCG     | 131  | 154  | 14  | 1391  | 75  | 2  | 4117  | 27928  | 2902  | 163  | 4857  | 18  | 142  | 2601  |
| CCGG     | 31   | 65   | 14  | 597   | 20  | 0  | 1176  | 87975  | 1210  | 122  | 1769  | 11  | 55   | 532   |
| CCTG     | 213  | 227  | 19  | 2425  | 92  | 11 | 6840  | 14272  | 3348  | 238  | 7943  | 28  | 204  | 3846  |
| GCAG     | 106  | 120  | 8   | 1128  | 52  | 2  | 3844  | 53180  | 2546  | 196  | 3621  | 12  | 95   | 1847  |
| GCCG     | 147  | 148  | 7   | 1142  | 80  | 3  | 4174  | 11783  | 2406  | 160  | 3363  | 16  | 112  | 1630  |
| GCGG     | 25   | 42   | 2   | 525   | 33  | 1  | 776   | 52658  | 1113  | 52   | 918   | 5   | 27   | 423   |
| GCTG     | 225  | 146  | 9   | 1650  | 81  | 5  | 5116  | 43761  | 2187  | 177  | 5418  | 14  | 135  | 2045  |
| TCAG     | 391  | 266  | 22  | 16099 | 79  | 46 | 12809 | 12172  | 8882  | 265  | 13033 | 49  | 359  | 3968  |
| TCCG     | 279  | 185  | 18  | 4896  | 95  | 14 | 7208  | 41020  | 4566  | 244  | 7977  | 30  | 264  | 4441  |
| TCCG     | 30   | 52   | 11  | 794   | 13  | 2  | 1294  | 9554   | 992   | 64   | 1423  | 11  | 33   | 553   |
| TCTG     | 660  | 444  | 44  | 21847 | 202 | 53 | 21720 | 3519   | 10841 | 449  | 20292 | 75  | 563  | 7668  |
| ACAT     | 950  | 931  | 97  | 3557  | 440 | 14 | 46364 | 28569  | 6530  | 1137 | 13367 | 66  | 542  | 8872  |
| ACCT     | 482  | 482  | 49  | 1875  | 265 | 14 | 16724 | 47067  | 3418  | 590  | 6543  | 100 | 285  | 4786  |
| ACGT     | 1085 | 2373 | 289 | 4978  | 792 | 70 | 78681 | 17833  | 3830  | 3694 | 17475 | 585 | 1603 | 9034  |
| ACTT     | 603  | 628  | 57  | 2570  | 263 | 11 | 21545 | 63195  | 4179  | 827  | 10578 | 54  | 380  | 6567  |
| CCAT     | 729  | 542  | 74  | 3344  | 294 | 16 | 19611 | 23743  | 7430  | 801  | 8689  | 79  | 428  | 7106  |
| CCCT     | 607  | 545  | 78  | 2443  | 337 | 10 | 18553 | 52051  | 6155  | 810  | 7554  | 70  | 325  | 6038  |
| CCGT     | 845  | 1095 | 180 | 3489  | 483 | 70 | 53496 | 7282   | 4362  | 1983 | 11157 | 498 | 888  | 4824  |
| CCTT     | 784  | 774  | 124 | 3468  | 380 | 13 | 22137 | 29223  | 7932  | 854  | 11714 | 69  | 430  | 8606  |
| GCAT     | 615  | 531  | 65  | 2815  | 285 | 16 | 31548 | 50399  | 4166  | 711  | 8492  | 107 | 420  | 6069  |
| GCCT     | 583  | 484  | 64  | 2256  | 295 | 14 | 34372 | 10858  | 3715  | 825  | 7784  | 120 | 402  | 5474  |
| GCGT     | 930  | 1382 | 152 | 3870  | 546 | 60 | 75814 | 35864  | 3544  | 2428 | 13447 | 629 | 1294 | 5232  |
| GCTT     | 660  | 585  | 78  | 2254  | 316 | 15 | 26554 | 49322  | 3836  | 741  | 8329  | 93  | 378  | 5765  |
| TCAT     | 1531 | 761  | 86  | 25251 | 268 | 69 | 30161 | 11611  | 13414 | 780  | 13880 | 131 | 681  | 9723  |
| TCCT     | 1172 | 685  | 73  | 7268  | 319 | 25 | 23799 | 31779  | 7136  | 859  | 10287 | 112 | 544  | 8833  |
| TCGT     | 628  | 903  | 127 | 4510  | 281 | 58 | 33759 | 53275  | 2998  | 1553 | 8055  | 300 | 708  | 3772  |
| TCTT     | 1466 | 813  | 57  | 13615 | 313 | 43 | 29570 | 21922  | 11432 | 859  | 12692 | 79  | 662  | 8933  |

Table S3: Table S2 continued: occurrence counts (aggregated by cancer types) for the next 48 mutation categories.

| Mutation | X1   | X2  | X3 | X4   | X5  | X6 | X7     | X8    | X9   | X10 | X11   | X12 | X13 | X14   |
|----------|------|-----|----|------|-----|----|--------|-------|------|-----|-------|-----|-----|-------|
| ATAA     | 385  | 382 | 22 | 1375 | 248 | 2  | 9613   | 35715 | 3957 | 315 | 5776  | 7   | 313 | 9726  |
| ATCA     | 241  | 274 | 13 | 1388 | 191 | 6  | 9419   | 7570  | 1917 | 235 | 4439  | 18  | 214 | 2973  |
| ATGA     | 232  | 344 | 21 | 1459 | 211 | 4  | 7666   | 48117 | 3962 | 228 | 5983  | 18  | 197 | 7703  |
| ATTA     | 580  | 516 | 29 | 2262 | 301 | 5  | 30067  | 32078 | 2928 | 590 | 9131  | 16  | 523 | 5833  |
| CTAA     | 185  | 217 | 9  | 1009 | 98  | 3  | 5551   | 9978  | 4331 | 151 | 4473  | 10  | 175 | 12963 |
| CTCA     | 211  | 256 | 17 | 1535 | 118 | 6  | 14584  | 41504 | 3430 | 224 | 6343  | 21  | 184 | 6465  |
| CTGA     | 219  | 227 | 26 | 1406 | 146 | 12 | 8654   | 8508  | 7905 | 210 | 6473  | 28  | 207 | 14356 |
| CTTA     | 379  | 408 | 27 | 1716 | 162 | 6  | 24273  | 2400  | 4255 | 303 | 8578  | 24  | 221 | 8077  |
| GTAA     | 180  | 162 | 10 | 797  | 82  | 1  | 4092   | 36890 | 3147 | 104 | 3254  | 5   | 138 | 5769  |
| GTCA     | 174  | 147 | 8  | 791  | 80  | 1  | 5919   | 25736 | 1399 | 113 | 3026  | 10  | 79  | 1954  |
| GTGA     | 156  | 145 | 9  | 948  | 102 | 10 | 6717   | 9623  | 4021 | 122 | 4233  | 8   | 135 | 3924  |
| GTTA     | 181  | 272 | 14 | 1168 | 129 | 3  | 10065  | 43279 | 2112 | 200 | 5741  | 10  | 156 | 2579  |
| TAA      | 576  | 454 | 29 | 2192 | 256 | 2  | 20211  | 13356 | 4086 | 510 | 6936  | 16  | 499 | 11629 |
| TCA      | 158  | 202 | 17 | 1095 | 110 | 3  | 7296   | 75515 | 1766 | 222 | 4859  | 12  | 142 | 4966  |
| TGA      | 179  | 156 | 4  | 774  | 144 | 3  | 5147   | 5013  | 2912 | 140 | 3493  | 10  | 129 | 7897  |
| TATA     | 434  | 467 | 37 | 2298 | 289 | 3  | 27521  | 12174 | 3117 | 481 | 10786 | 8   | 417 | 10311 |
| ATAC     | 910  | 792 | 84 | 3342 | 519 | 10 | 34145  | 35102 | 7884 | 865 | 14628 | 36  | 552 | 11060 |
| ATCC     | 382  | 255 | 32 | 1439 | 192 | 7  | 14365  | 4444  | 1952 | 354 | 6071  | 22  | 206 | 2821  |
| ATGC     | 572  | 526 | 51 | 2354 | 329 | 14 | 28630  | 16789 | 5325 | 534 | 10017 | 48  | 331 | 6561  |
| ATTC     | 792  | 734 | 94 | 3340 | 457 | 11 | 22018  | 48320 | 4344 | 769 | 13211 | 38  | 503 | 6714  |
| CTAC     | 456  | 283 | 30 | 1378 | 187 | 1  | 21942  | 9143  | 4198 | 301 | 5972  | 21  | 202 | 4855  |
| CTCC     | 427  | 295 | 31 | 1670 | 197 | 5  | 31474  | 13443 | 2361 | 331 | 7202  | 48  | 163 | 3092  |
| CTGC     | 531  | 328 | 29 | 1659 | 222 | 6  | 38742  | 59589 | 3845 | 360 | 6553  | 60  | 206 | 4024  |
| CTTC     | 795  | 328 | 48 | 1828 | 316 | 12 | 73708  | 10381 | 3566 | 383 | 8088  | 48  | 239 | 4982  |
| GTAC     | 452  | 378 | 30 | 1533 | 215 | 4  | 25980  | 46065 | 3605 | 462 | 6804  | 48  | 345 | 4411  |
| GTCC     | 404  | 332 | 25 | 981  | 176 | 10 | 15268  | 17372 | 1619 | 299 | 4123  | 20  | 195 | 1823  |
| GTGC     | 370  | 284 | 33 | 1233 | 189 | 8  | 24550  | 54718 | 2912 | 332 | 5851  | 48  | 211 | 2962  |
| GTTC     | 511  | 447 | 46 | 1680 | 269 | 7  | 22803  | 46663 | 2547 | 532 | 7513  | 36  | 367 | 3575  |
| TTAC     | 541  | 428 | 48 | 1819 | 297 | 2  | 22540  | 16834 | 3732 | 497 | 7741  | 25  | 372 | 6232  |
| TTCC     | 606  | 383 | 44 | 1610 | 211 | 2  | 25505  | 42903 | 1979 | 473 | 7086  | 24  | 280 | 3847  |
| TTGC     | 306  | 242 | 22 | 1079 | 185 | 9  | 17328  | 8016  | 2277 | 323 | 4419  | 24  | 210 | 2892  |
| TTTC     | 818  | 437 | 60 | 2187 | 415 | 4  | 48109  | 2717  | 3140 | 617 | 10866 | 28  | 427 | 13766 |
| ATAG     | 462  | 133 | 9  | 862  | 229 | 2  | 5956   | 20568 | 1055 | 164 | 3114  | 5   | 158 | 2747  |
| ATCG     | 134  | 69  | 3  | 451  | 51  | 0  | 5214   | 50363 | 476  | 92  | 1335  | 10  | 93  | 1949  |
| ATGG     | 196  | 136 | 11 | 941  | 76  | 3  | 5505   | 35331 | 1134 | 165 | 3935  | 5   | 116 | 2726  |
| ATTG     | 580  | 155 | 17 | 1030 | 166 | 2  | 31252  | 58405 | 1010 | 177 | 3455  | 11  | 221 | 4941  |
| CTAG     | 416  | 110 | 4  | 601  | 134 | 3  | 5035   | 29104 | 779  | 85  | 1932  | 3   | 87  | 1381  |
| CTCG     | 219  | 91  | 16 | 759  | 71  | 4  | 14376  | 86003 | 695  | 96  | 2754  | 15  | 96  | 1628  |
| CTGG     | 342  | 137 | 7  | 1165 | 140 | 4  | 12511  | 13036 | 1684 | 142 | 4488  | 19  | 142 | 2080  |
| CTTG     | 1780 | 202 | 21 | 1560 | 344 | 5  | 142206 | 27191 | 1801 | 187 | 4424  | 38  | 171 | 2944  |
| GTAG     | 224  | 82  | 3  | 617  | 78  | 0  | 2552   | 45734 | 746  | 87  | 1792  | 3   | 45  | 896   |
| GTCG     | 132  | 53  | 4  | 667  | 43  | 0  | 3804   | 10333 | 542  | 53  | 1290  | 10  | 47  | 628   |
| GTGG     | 183  | 102 | 12 | 2989 | 116 | 2  | 5256   | 21041 | 2874 | 171 | 5467  | 16  | 58  | 1313  |
| GTTG     | 1090 | 113 | 14 | 1194 | 142 | 3  | 37454  | 46981 | 1106 | 174 | 3439  | 13  | 122 | 1423  |
| TTAG     | 654  | 199 | 19 | 1021 | 260 | 1  | 7674   | 11096 | 1235 | 187 | 3327  | 14  | 158 | 2799  |
| TTCG     | 167  | 96  | 13 | 725  | 79  | 2  | 8315   | 32124 | 740  | 130 | 2507  | 12  | 125 | 3312  |
| TTGG     | 265  | 132 | 16 | 1124 | 121 | 7  | 11452  | 62446 | 1693 | 161 | 4480  | 8   | 142 | 2974  |
| TTTG     | 1349 | 296 | 43 | 2144 | 403 | 4  | 77262  | 28801 | 2361 | 379 | 7679  | 39  | 353 | 11415 |

Table S4: Top 10 clusterings by occurrence counts (second column) in 150,000 runs (performed as 15 consecutive batches of 10,000 runs in each batch). Each run is based on 1,000 samplings (i.e., `num.try = 1000` in the R function `qrm.stat.ind.class()`; also, the target number of clusters is  $k = 7$ ; see Appendix A for details). The columns “Cl-1” through “Cl-7” give the numbers of mutations in each cluster (the total number of mutations in each clustering is 96). The entries “–” correspond to clusterings with fewer than 7 clusters. Note that Clustering-C and Clustering-H have the same numbers of mutations in their 7 clusters; however, these two clusterings are different, i.e., equally-sized clusters contain different mutations. While there was slight variability in the placement (by occurrence counts) of the top 10 clusterings within the aforesaid 15 batches of 10,000 runs, Clustering-A through Clustering-J invariably were the top 10 in each batch. The weights are given in Tables 1 through S10 (for Clustering-A through Clustering-D) and 3 and 4 (for Clustering-A).

| Name         | Count | Cl-1 | Cl-2 | Cl-3 | Cl-4 | Cl-5 | Cl-6 | Cl-7 |
|--------------|-------|------|------|------|------|------|------|------|
| Clustering-A | 12085 | 8    | 8    | 10   | 15   | 16   | 18   | 21   |
| Clustering-B | 10962 | 7    | 8    | 8    | 12   | 15   | 17   | 29   |
| Clustering-C | 10788 | 8    | 8    | 11   | 15   | 16   | 17   | 21   |
| Clustering-D | 10328 | 8    | 8    | 15   | 16   | 18   | 31   | –    |
| Clustering-E | 6499  | 7    | 8    | 8    | 12   | 15   | 18   | 28   |
| Clustering-F | 5451  | 8    | 8    | 15   | 17   | 17   | 31   | –    |
| Clustering-G | 5421  | 8    | 8    | 10   | 15   | 17   | 17   | 21   |
| Clustering-H | 5302  | 8    | 8    | 11   | 15   | 16   | 17   | 21   |
| Clustering-I | 4602  | 8    | 8    | 10   | 15   | 21   | 34   | –    |
| Clustering-J | 3698  | 8    | 8    | 15   | 31   | 34   | –    | –    |

Table S5: Weights for the first 48 mutation categories for the 7 clusters in Clustering-B (see Table S4). The conventions are the same as in Table 1.

| Mutation | Cl-1  | Cl-2  | Cl-3  | Cl-4  | Cl-5 | Cl-6 | Cl-7 | Cl-1  | Cl-2  | Cl-3  | Cl-4  | Cl-5 | Cl-6 | Cl-7 |
|----------|-------|-------|-------|-------|------|------|------|-------|-------|-------|-------|------|------|------|
| ACAA     | 0.00  | 0.00  | 0.00  | 0.00  | 6.55 | 0.00 | 0.00 | 0.00  | 0.00  | 0.00  | 0.00  | 6.55 | 0.00 | 0.00 |
| ACCA     | 0.00  | 0.00  | 0.00  | 6.66  | 0.00 | 0.00 | 0.00 | 0.00  | 0.00  | 0.00  | 7.03  | 0.00 | 0.00 | 0.00 |
| ACGA     | 0.00  | 0.00  | 0.00  | 0.00  | 0.00 | 0.00 | 3.07 | 0.00  | 0.00  | 0.00  | 0.00  | 0.00 | 0.00 | 2.91 |
| ACTA     | 0.00  | 0.00  | 0.00  | 6.99  | 0.00 | 0.00 | 0.00 | 0.00  | 0.00  | 0.00  | 7.33  | 0.00 | 0.00 | 0.00 |
| CCAA     | 0.00  | 0.00  | 0.00  | 9.30  | 0.00 | 0.00 | 0.00 | 0.00  | 0.00  | 0.00  | 9.73  | 0.00 | 0.00 | 0.00 |
| CCCA     | 0.00  | 0.00  | 0.00  | 7.52  | 0.00 | 0.00 | 0.00 | 0.00  | 0.00  | 0.00  | 7.93  | 0.00 | 0.00 | 0.00 |
| CCGA     | 0.00  | 0.00  | 0.00  | 0.00  | 0.00 | 0.00 | 2.41 | 0.00  | 0.00  | 0.00  | 0.00  | 0.00 | 0.00 | 2.51 |
| CCTA     | 0.00  | 0.00  | 0.00  | 8.69  | 0.00 | 0.00 | 0.00 | 0.00  | 0.00  | 0.00  | 9.10  | 0.00 | 0.00 | 0.00 |
| GCAA     | 0.00  | 4.05  | 0.00  | 0.00  | 0.00 | 0.00 | 0.00 | 0.00  | 4.65  | 0.00  | 0.00  | 0.00 | 0.00 | 0.00 |
| GCCA     | 0.00  | 0.00  | 0.00  | 5.20  | 0.00 | 0.00 | 0.00 | 0.00  | 0.00  | 0.00  | 5.46  | 0.00 | 0.00 | 0.00 |
| GCGA     | 0.00  | 0.00  | 13.81 | 0.00  | 0.00 | 0.00 | 0.00 | 0.00  | 0.00  | 13.89 | 0.00  | 0.00 | 0.00 | 0.00 |
| GCTA     | 0.00  | 0.00  | 0.00  | 5.70  | 0.00 | 0.00 | 0.00 | 0.00  | 0.00  | 0.00  | 5.97  | 0.00 | 0.00 | 0.00 |
| TCAA     | 0.00  | 0.00  | 0.00  | 0.00  | 6.26 | 0.00 | 0.00 | 0.00  | 0.00  | 0.00  | 0.00  | 6.21 | 0.00 | 0.00 |
| TCCA     | 0.00  | 0.00  | 0.00  | 9.80  | 0.00 | 0.00 | 0.00 | 0.00  | 0.00  | 0.00  | 10.21 | 0.00 | 0.00 | 0.00 |
| TCGA     | 0.00  | 0.00  | 11.87 | 0.00  | 0.00 | 0.00 | 0.00 | 0.00  | 0.00  | 12.24 | 0.00  | 0.00 | 0.00 | 0.00 |
| TCTA     | 0.00  | 0.00  | 0.00  | 0.00  | 8.05 | 0.00 | 0.00 | 0.00  | 0.00  | 0.00  | 0.00  | 8.00 | 0.00 | 0.00 |
| ACAG     | 13.14 | 0.00  | 0.00  | 0.00  | 0.00 | 0.00 | 0.00 | 13.38 | 0.00  | 0.00  | 0.00  | 0.00 | 0.00 | 0.00 |
| ACCG     | 0.00  | 0.00  | 0.00  | 0.00  | 0.00 | 0.00 | 2.76 | 0.00  | 0.00  | 0.00  | 0.00  | 0.00 | 0.00 | 2.91 |
| ACGG     | 0.00  | 0.00  | 12.62 | 0.00  | 0.00 | 0.00 | 0.00 | 0.00  | 0.00  | 12.22 | 0.00  | 0.00 | 0.00 | 0.00 |
| ACTG     | 17.06 | 0.00  | 0.00  | 0.00  | 0.00 | 0.00 | 0.00 | 17.11 | 0.00  | 0.00  | 0.00  | 0.00 | 0.00 | 0.00 |
| CCAG     | 0.00  | 0.00  | 0.00  | 0.00  | 0.00 | 0.00 | 3.16 | 0.00  | 0.00  | 0.00  | 0.00  | 0.00 | 0.00 | 3.32 |
| CCCG     | 0.00  | 0.00  | 0.00  | 0.00  | 0.00 | 0.00 | 3.22 | 0.00  | 0.00  | 0.00  | 0.00  | 0.00 | 0.00 | 3.24 |
| CCGG     | 0.00  | 0.00  | 0.00  | 0.00  | 0.00 | 0.00 | 3.64 | 0.00  | 0.00  | 0.00  | 0.00  | 0.00 | 0.00 | 3.27 |
| CCTG     | 0.00  | 0.00  | 0.00  | 0.00  | 0.00 | 0.00 | 4.32 | 0.00  | 0.00  | 0.00  | 0.00  | 0.00 | 0.00 | 4.51 |
| GCAG     | 0.00  | 0.00  | 0.00  | 0.00  | 0.00 | 0.00 | 3.48 | 0.00  | 0.00  | 0.00  | 0.00  | 0.00 | 0.00 | 3.34 |
| GCCG     | 0.00  | 0.00  | 14.79 | 0.00  | 0.00 | 0.00 | 0.00 | 0.00  | 0.00  | 15.62 | 0.00  | 0.00 | 0.00 | 0.00 |
| GCGG     | 0.00  | 0.00  | 15.50 | 0.00  | 0.00 | 0.00 | 0.00 | 0.00  | 0.00  | 13.92 | 0.00  | 0.00 | 0.00 | 0.00 |
| GCTG     | 0.00  | 0.00  | 0.00  | 0.00  | 0.00 | 0.00 | 3.82 | 0.00  | 0.00  | 0.00  | 0.00  | 0.00 | 0.00 | 3.78 |
| TCAG     | 0.00  | 0.00  | 0.00  | 12.20 | 0.00 | 0.00 | 0.00 | 0.00  | 0.00  | 0.00  | 10.90 | 0.00 | 0.00 | 0.00 |
| TCCG     | 0.00  | 0.00  | 0.00  | 5.76  | 0.00 | 0.00 | 0.00 | 0.00  | 0.00  | 0.00  | 5.60  | 0.00 | 0.00 | 0.00 |
| TCCG     | 0.00  | 0.00  | 8.40  | 0.00  | 0.00 | 0.00 | 0.00 | 0.00  | 0.00  | 8.65  | 0.00  | 0.00 | 0.00 | 0.00 |
| TCTG     | 0.00  | 0.00  | 0.00  | 16.63 | 0.00 | 0.00 | 0.00 | 0.00  | 0.00  | 0.00  | 15.02 | 0.00 | 0.00 | 0.00 |
| ACAT     | 0.00  | 0.00  | 0.00  | 0.00  | 7.67 | 0.00 | 0.00 | 0.00  | 0.00  | 0.00  | 0.00  | 7.71 | 0.00 | 0.00 |
| ACCT     | 0.00  | 4.78  | 0.00  | 0.00  | 0.00 | 0.00 | 0.00 | 0.00  | 5.02  | 0.00  | 0.00  | 0.00 | 0.00 | 0.00 |
| ACGT     | 0.00  | 23.47 | 0.00  | 0.00  | 0.00 | 0.00 | 0.00 | 0.00  | 23.18 | 0.00  | 0.00  | 0.00 | 0.00 | 0.00 |
| ACTT     | 0.00  | 0.00  | 0.00  | 0.00  | 5.43 | 0.00 | 0.00 | 0.00  | 0.00  | 0.00  | 0.00  | 5.47 | 0.00 | 0.00 |
| CCAT     | 0.00  | 0.00  | 0.00  | 0.00  | 6.02 | 0.00 | 0.00 | 0.00  | 0.00  | 0.00  | 0.00  | 6.02 | 0.00 | 0.00 |
| CCCT     | 0.00  | 0.00  | 0.00  | 0.00  | 5.59 | 0.00 | 0.00 | 0.00  | 0.00  | 0.00  | 0.00  | 5.63 | 0.00 | 0.00 |
| CCGT     | 0.00  | 17.66 | 0.00  | 0.00  | 0.00 | 0.00 | 0.00 | 0.00  | 17.12 | 0.00  | 0.00  | 0.00 | 0.00 | 0.00 |
| CCTT     | 0.00  | 0.00  | 0.00  | 0.00  | 7.01 | 0.00 | 0.00 | 0.00  | 0.00  | 0.00  | 0.00  | 7.04 | 0.00 | 0.00 |
| GCAT     | 0.00  | 0.00  | 0.00  | 0.00  | 5.98 | 0.00 | 0.00 | 0.00  | 0.00  | 0.00  | 0.00  | 6.01 | 0.00 | 0.00 |
| GCCT     | 0.00  | 5.74  | 0.00  | 0.00  | 0.00 | 0.00 | 0.00 | 0.00  | 5.93  | 0.00  | 0.00  | 0.00 | 0.00 | 0.00 |
| GCGT     | 0.00  | 20.46 | 0.00  | 0.00  | 0.00 | 0.00 | 0.00 | 0.00  | 19.80 | 0.00  | 0.00  | 0.00 | 0.00 | 0.00 |
| GCTT     | 0.00  | 0.00  | 0.00  | 0.00  | 5.88 | 0.00 | 0.00 | 0.00  | 0.00  | 0.00  | 0.00  | 5.93 | 0.00 | 0.00 |
| TCAT     | 0.00  | 11.42 | 0.00  | 0.00  | 0.00 | 0.00 | 0.00 | 0.00  | 12.00 | 0.00  | 0.00  | 0.00 | 0.00 | 0.00 |
| TCCT     | 0.00  | 0.00  | 0.00  | 0.00  | 7.81 | 0.00 | 0.00 | 0.00  | 0.00  | 0.00  | 0.00  | 7.76 | 0.00 | 0.00 |
| TCGT     | 0.00  | 12.42 | 0.00  | 0.00  | 0.00 | 0.00 | 0.00 | 0.00  | 12.30 | 0.00  | 0.00  | 0.00 | 0.00 | 0.00 |
| TCTT     | 0.00  | 0.00  | 0.00  | 0.00  | 9.47 | 0.00 | 0.00 | 0.00  | 0.00  | 0.00  | 0.00  | 9.29 | 0.00 | 0.00 |

Table S6: Table S5 continued: weights for the next 48 mutation categories.

| Mutation | CI-1  | CI-2 | CI-3  | CI-4 | CI-5 | CI-6  | CI-7 | CI-1  | CI-2 | CI-3  | CI-4 | CI-5 | CI-6 | CI-7 |
|----------|-------|------|-------|------|------|-------|------|-------|------|-------|------|------|------|------|
| ATAA     | 14.61 | 0.00 | 0.00  | 0.00 | 0.00 | 0.00  | 0.00 | 14.91 | 0.00 | 0.00  | 0.00 | 0.00 | 0.00 | 0.00 |
| ATCA     | 0.00  | 0.00 | 0.00  | 0.00 | 0.00 | 0.00  | 3.46 | 0.00  | 0.00 | 0.00  | 0.00 | 0.00 | 0.00 | 3.65 |
| ATGA     | 13.85 | 0.00 | 0.00  | 0.00 | 0.00 | 0.00  | 0.00 | 14.13 | 0.00 | 0.00  | 0.00 | 0.00 | 0.00 | 0.00 |
| ATTA     | 0.00  | 0.00 | 0.00  | 0.00 | 0.00 | 5.95  | 0.00 | 0.00  | 0.00 | 0.00  | 0.00 | 0.00 | 6.08 | 0.00 |
| CTAA     | 0.00  | 0.00 | 0.00  | 0.00 | 0.00 | 0.00  | 3.93 | 0.00  | 0.00 | 0.00  | 0.00 | 0.00 | 0.00 | 4.01 |
| CTCA     | 12.75 | 0.00 | 0.00  | 0.00 | 0.00 | 0.00  | 0.00 | 12.93 | 0.00 | 0.00  | 0.00 | 0.00 | 0.00 | 0.00 |
| CTGA     | 0.00  | 0.00 | 0.00  | 5.54 | 0.00 | 0.00  | 0.00 | 0.00  | 0.00 | 0.00  | 5.73 | 0.00 | 0.00 | 0.00 |
| CTTA     | 0.00  | 0.00 | 0.00  | 0.00 | 0.00 | 4.55  | 0.00 | 0.00  | 0.00 | 0.00  | 0.00 | 0.00 | 4.62 | 0.00 |
| GTAA     | 0.00  | 0.00 | 0.00  | 0.00 | 0.00 | 0.00  | 3.44 | 0.00  | 0.00 | 0.00  | 0.00 | 0.00 | 0.00 | 3.36 |
| GTCA     | 0.00  | 0.00 | 15.20 | 0.00 | 0.00 | 0.00  | 0.00 | 0.00  | 0.00 | 15.36 | 0.00 | 0.00 | 0.00 | 0.00 |
| GTGA     | 0.00  | 0.00 | 0.00  | 0.00 | 0.00 | 0.00  | 3.13 | 0.00  | 0.00 | 0.00  | 0.00 | 0.00 | 0.00 | 3.26 |
| GTTA     | 0.00  | 0.00 | 0.00  | 0.00 | 0.00 | 0.00  | 4.04 | 0.00  | 0.00 | 0.00  | 0.00 | 0.00 | 0.00 | 4.00 |
| TCAA     | 0.00  | 0.00 | 0.00  | 0.00 | 0.00 | 5.49  | 0.00 | 0.00  | 0.00 | 0.00  | 0.00 | 0.00 | 5.64 | 0.00 |
| TCCA     | 0.00  | 0.00 | 0.00  | 0.00 | 0.00 | 0.00  | 4.99 | 0.00  | 0.00 | 0.00  | 0.00 | 0.00 | 0.00 | 4.77 |
| TCTA     | 0.00  | 0.00 | 0.00  | 0.00 | 0.00 | 0.00  | 2.94 | 0.00  | 0.00 | 0.00  | 0.00 | 0.00 | 0.00 | 3.05 |
| TCTA     | 0.00  | 0.00 | 0.00  | 0.00 | 0.00 | 5.65  | 0.00 | 0.00  | 0.00 | 0.00  | 0.00 | 0.00 | 5.77 | 0.00 |
| ATAC     | 0.00  | 0.00 | 0.00  | 0.00 | 7.03 | 0.00  | 0.00 | 0.00  | 0.00 | 0.00  | 0.00 | 7.06 | 0.00 | 0.00 |
| ATCC     | 0.00  | 0.00 | 0.00  | 0.00 | 0.00 | 3.53  | 0.00 | 0.00  | 0.00 | 0.00  | 0.00 | 0.00 | 3.64 | 0.00 |
| ATGC     | 0.00  | 0.00 | 0.00  | 0.00 | 4.97 | 0.00  | 0.00 | 0.00  | 0.00 | 0.00  | 0.00 | 4.98 | 0.00 | 0.00 |
| ATTC     | 0.00  | 0.00 | 0.00  | 0.00 | 6.30 | 0.00  | 0.00 | 0.00  | 0.00 | 0.00  | 0.00 | 6.34 | 0.00 | 0.00 |
| CTAC     | 0.00  | 0.00 | 0.00  | 0.00 | 0.00 | 4.03  | 0.00 | 0.00  | 0.00 | 0.00  | 0.00 | 0.00 | 4.08 | 0.00 |
| CTCC     | 0.00  | 0.00 | 0.00  | 0.00 | 0.00 | 4.59  | 0.00 | 0.00  | 0.00 | 0.00  | 0.00 | 0.00 | 4.61 | 0.00 |
| CTGC     | 0.00  | 0.00 | 0.00  | 0.00 | 0.00 | 5.75  | 0.00 | 0.00  | 0.00 | 0.00  | 0.00 | 0.00 | 5.79 | 0.00 |
| CTTC     | 0.00  | 0.00 | 0.00  | 0.00 | 0.00 | 7.65  | 0.00 | 0.00  | 0.00 | 0.00  | 0.00 | 0.00 | 7.41 | 0.00 |
| GTAC     | 0.00  | 0.00 | 0.00  | 0.00 | 0.00 | 5.18  | 0.00 | 0.00  | 0.00 | 0.00  | 0.00 | 0.00 | 5.32 | 0.00 |
| GTCC     | 0.00  | 0.00 | 0.00  | 0.00 | 0.00 | 0.00  | 4.18 | 0.00  | 0.00 | 0.00  | 0.00 | 0.00 | 0.00 | 4.36 |
| GTGC     | 0.00  | 0.00 | 0.00  | 0.00 | 0.00 | 4.63  | 0.00 | 0.00  | 0.00 | 0.00  | 0.00 | 0.00 | 4.76 | 0.00 |
| GTTT     | 0.00  | 0.00 | 0.00  | 0.00 | 0.00 | 5.42  | 0.00 | 0.00  | 0.00 | 0.00  | 0.00 | 0.00 | 5.62 | 0.00 |
| TTAC     | 0.00  | 0.00 | 0.00  | 0.00 | 0.00 | 5.32  | 0.00 | 0.00  | 0.00 | 0.00  | 0.00 | 0.00 | 5.47 | 0.00 |
| TTCC     | 0.00  | 0.00 | 0.00  | 0.00 | 0.00 | 5.05  | 0.00 | 0.00  | 0.00 | 0.00  | 0.00 | 0.00 | 5.16 | 0.00 |
| TTGC     | 0.00  | 0.00 | 0.00  | 0.00 | 0.00 | 0.00  | 3.98 | 0.00  | 0.00 | 0.00  | 0.00 | 0.00 | 0.00 | 4.20 |
| TTTC     | 0.00  | 0.00 | 0.00  | 0.00 | 0.00 | 7.82  | 0.00 | 0.00  | 0.00 | 0.00  | 0.00 | 0.00 | 7.82 | 0.00 |
| ATAG     | 0.00  | 0.00 | 0.00  | 0.00 | 0.00 | 0.00  | 3.18 | 0.00  | 0.00 | 0.00  | 0.00 | 0.00 | 0.00 | 3.24 |
| ATCG     | 0.00  | 0.00 | 0.00  | 0.00 | 0.00 | 0.00  | 2.70 | 0.00  | 0.00 | 0.00  | 0.00 | 0.00 | 0.00 | 2.52 |
| ATGG     | 0.00  | 0.00 | 0.00  | 0.00 | 0.00 | 0.00  | 3.09 | 0.00  | 0.00 | 0.00  | 0.00 | 0.00 | 0.00 | 3.04 |
| ATTG     | 14.44 | 0.00 | 0.00  | 0.00 | 0.00 | 0.00  | 0.00 | 14.09 | 0.00 | 0.00  | 0.00 | 0.00 | 0.00 | 0.00 |
| CTAG     | 0.00  | 0.00 | 0.00  | 0.00 | 0.00 | 0.00  | 2.68 | 0.00  | 0.00 | 0.00  | 0.00 | 0.00 | 0.00 | 2.66 |
| CTCG     | 0.00  | 0.00 | 0.00  | 0.00 | 0.00 | 0.00  | 4.59 | 0.00  | 0.00 | 0.00  | 0.00 | 0.00 | 0.00 | 4.30 |
| CTGG     | 0.00  | 0.00 | 0.00  | 0.00 | 0.00 | 0.00  | 3.07 | 0.00  | 0.00 | 0.00  | 0.00 | 0.00 | 0.00 | 3.19 |
| CTTG     | 0.00  | 0.00 | 0.00  | 0.00 | 0.00 | 10.44 | 0.00 | 0.00  | 0.00 | 0.00  | 0.00 | 0.00 | 9.55 | 0.00 |
| GTAG     | 0.00  | 0.00 | 0.00  | 0.00 | 0.00 | 0.00  | 2.52 | 0.00  | 0.00 | 0.00  | 0.00 | 0.00 | 0.00 | 2.36 |
| GTCG     | 0.00  | 0.00 | 7.80  | 0.00 | 0.00 | 0.00  | 0.00 | 0.00  | 0.00 | 8.11  | 0.00 | 0.00 | 0.00 | 0.00 |
| GTGG     | 0.00  | 0.00 | 0.00  | 0.00 | 0.00 | 0.00  | 3.18 | 0.00  | 0.00 | 0.00  | 0.00 | 0.00 | 0.00 | 3.25 |
| GTTG     | 14.14 | 0.00 | 0.00  | 0.00 | 0.00 | 0.00  | 0.00 | 13.44 | 0.00 | 0.00  | 0.00 | 0.00 | 0.00 | 0.00 |
| TTAG     | 0.00  | 0.00 | 0.00  | 0.00 | 0.00 | 0.00  | 3.48 | 0.00  | 0.00 | 0.00  | 0.00 | 0.00 | 0.00 | 3.62 |
| TTCC     | 0.00  | 0.00 | 0.00  | 0.00 | 0.00 | 0.00  | 2.91 | 0.00  | 0.00 | 0.00  | 0.00 | 0.00 | 0.00 | 2.87 |
| TTGC     | 0.00  | 0.00 | 0.00  | 0.00 | 0.00 | 0.00  | 4.62 | 0.00  | 0.00 | 0.00  | 0.00 | 0.00 | 0.00 | 4.49 |
| TTTG     | 0.00  | 0.00 | 0.00  | 0.00 | 0.00 | 8.95  | 0.00 | 0.00  | 0.00 | 0.00  | 0.00 | 0.00 | 8.65 | 0.00 |

Table S7: Weights for the first 48 mutation categories for the 7 clusters in Clustering-C (see Table S4). The conventions are the same as in Table 1.

| Mutation | Cl-1  | Cl-2  | Cl-3  | Cl-4 | Cl-5  | Cl-6 | Cl-7 | Cl-1  | Cl-2  | Cl-3  | Cl-4 | Cl-5  | Cl-6 | Cl-7 |
|----------|-------|-------|-------|------|-------|------|------|-------|-------|-------|------|-------|------|------|
| ACAA     | 0.00  | 0.00  | 0.00  | 6.55 | 0.00  | 0.00 | 0.00 | 0.00  | 0.00  | 0.00  | 6.55 | 0.00  | 0.00 | 0.00 |
| ACCA     | 0.00  | 0.00  | 0.00  | 0.00 | 5.83  | 0.00 | 0.00 | 0.00  | 0.00  | 0.00  | 0.00 | 6.08  | 0.00 | 0.00 |
| ACGA     | 0.00  | 0.00  | 0.00  | 0.00 | 0.00  | 0.00 | 4.06 | 0.00  | 0.00  | 0.00  | 0.00 | 0.00  | 0.00 | 4.00 |
| ACTA     | 0.00  | 0.00  | 0.00  | 0.00 | 6.16  | 0.00 | 0.00 | 0.00  | 0.00  | 0.00  | 0.00 | 6.38  | 0.00 | 0.00 |
| CCAA     | 0.00  | 0.00  | 0.00  | 0.00 | 7.91  | 0.00 | 0.00 | 0.00  | 0.00  | 0.00  | 0.00 | 8.10  | 0.00 | 0.00 |
| CCCA     | 0.00  | 0.00  | 0.00  | 0.00 | 6.46  | 0.00 | 0.00 | 0.00  | 0.00  | 0.00  | 0.00 | 6.68  | 0.00 | 0.00 |
| CCGA     | 0.00  | 0.00  | 6.40  | 0.00 | 0.00  | 0.00 | 0.00 | 0.00  | 0.00  | 6.40  | 0.00 | 0.00  | 0.00 | 0.00 |
| CCTA     | 0.00  | 0.00  | 0.00  | 0.00 | 0.00  | 6.97 | 0.00 | 0.00  | 0.00  | 0.00  | 0.00 | 0.00  | 7.02 | 0.00 |
| GCAA     | 4.05  | 0.00  | 0.00  | 0.00 | 0.00  | 0.00 | 0.00 | 4.65  | 0.00  | 0.00  | 0.00 | 0.00  | 0.00 | 0.00 |
| GCCA     | 0.00  | 0.00  | 0.00  | 0.00 | 4.56  | 0.00 | 0.00 | 0.00  | 0.00  | 0.00  | 0.00 | 4.73  | 0.00 | 0.00 |
| GCGA     | 0.00  | 13.81 | 0.00  | 0.00 | 0.00  | 0.00 | 0.00 | 0.00  | 13.89 | 0.00  | 0.00 | 0.00  | 0.00 | 0.00 |
| GCTA     | 0.00  | 0.00  | 0.00  | 0.00 | 5.02  | 0.00 | 0.00 | 0.00  | 0.00  | 0.00  | 0.00 | 5.20  | 0.00 | 0.00 |
| TCAA     | 0.00  | 0.00  | 0.00  | 6.26 | 0.00  | 0.00 | 0.00 | 0.00  | 0.00  | 0.00  | 6.21 | 0.00  | 0.00 | 0.00 |
| TCCA     | 0.00  | 0.00  | 0.00  | 0.00 | 8.94  | 0.00 | 0.00 | 0.00  | 0.00  | 0.00  | 0.00 | 9.29  | 0.00 | 0.00 |
| TCGA     | 0.00  | 11.87 | 0.00  | 0.00 | 0.00  | 0.00 | 0.00 | 0.00  | 12.24 | 0.00  | 0.00 | 0.00  | 0.00 | 0.00 |
| TCTA     | 0.00  | 0.00  | 0.00  | 8.05 | 0.00  | 0.00 | 0.00 | 0.00  | 0.00  | 0.00  | 8.00 | 0.00  | 0.00 | 0.00 |
| ACAG     | 0.00  | 0.00  | 0.00  | 0.00 | 3.96  | 0.00 | 0.00 | 0.00  | 0.00  | 0.00  | 0.00 | 4.18  | 0.00 | 0.00 |
| ACCG     | 0.00  | 0.00  | 7.23  | 0.00 | 0.00  | 0.00 | 0.00 | 0.00  | 0.00  | 7.29  | 0.00 | 0.00  | 0.00 | 0.00 |
| ACGG     | 0.00  | 12.62 | 0.00  | 0.00 | 0.00  | 0.00 | 0.00 | 0.00  | 12.22 | 0.00  | 0.00 | 0.00  | 0.00 | 0.00 |
| ACTG     | 0.00  | 0.00  | 0.00  | 0.00 | 4.77  | 0.00 | 0.00 | 0.00  | 0.00  | 0.00  | 0.00 | 5.03  | 0.00 | 0.00 |
| CCAG     | 0.00  | 0.00  | 8.26  | 0.00 | 0.00  | 0.00 | 0.00 | 0.00  | 0.00  | 8.31  | 0.00 | 0.00  | 0.00 | 0.00 |
| CCCG     | 0.00  | 0.00  | 0.00  | 0.00 | 0.00  | 0.00 | 3.91 | 0.00  | 0.00  | 0.00  | 0.00 | 0.00  | 0.00 | 4.02 |
| CCGG     | 0.00  | 0.00  | 0.00  | 0.00 | 0.00  | 0.00 | 5.37 | 0.00  | 0.00  | 0.00  | 0.00 | 0.00  | 0.00 | 5.12 |
| CCTG     | 0.00  | 0.00  | 11.12 | 0.00 | 0.00  | 0.00 | 0.00 | 0.00  | 0.00  | 11.19 | 0.00 | 0.00  | 0.00 | 0.00 |
| GCAG     | 0.00  | 0.00  | 0.00  | 0.00 | 0.00  | 0.00 | 4.61 | 0.00  | 0.00  | 0.00  | 0.00 | 0.00  | 0.00 | 4.57 |
| GCCG     | 0.00  | 14.79 | 0.00  | 0.00 | 0.00  | 0.00 | 0.00 | 0.00  | 15.62 | 0.00  | 0.00 | 0.00  | 0.00 | 0.00 |
| GCGG     | 0.00  | 15.50 | 0.00  | 0.00 | 0.00  | 0.00 | 0.00 | 0.00  | 13.92 | 0.00  | 0.00 | 0.00  | 0.00 | 0.00 |
| GCTG     | 0.00  | 0.00  | 0.00  | 0.00 | 0.00  | 0.00 | 4.86 | 0.00  | 0.00  | 0.00  | 0.00 | 0.00  | 0.00 | 4.92 |
| TCAG     | 0.00  | 0.00  | 0.00  | 0.00 | 10.31 | 0.00 | 0.00 | 0.00  | 0.00  | 0.00  | 0.00 | 9.03  | 0.00 | 0.00 |
| TCCG     | 0.00  | 0.00  | 0.00  | 0.00 | 5.10  | 0.00 | 0.00 | 0.00  | 0.00  | 0.00  | 0.00 | 4.95  | 0.00 | 0.00 |
| TCCG     | 0.00  | 8.40  | 0.00  | 0.00 | 0.00  | 0.00 | 0.00 | 0.00  | 8.65  | 0.00  | 0.00 | 0.00  | 0.00 | 0.00 |
| TCTG     | 0.00  | 0.00  | 0.00  | 0.00 | 14.10 | 0.00 | 0.00 | 0.00  | 0.00  | 0.00  | 0.00 | 12.53 | 0.00 | 0.00 |
| ACAT     | 0.00  | 0.00  | 0.00  | 7.67 | 0.00  | 0.00 | 0.00 | 0.00  | 0.00  | 0.00  | 7.71 | 0.00  | 0.00 | 0.00 |
| ACCT     | 4.78  | 0.00  | 0.00  | 0.00 | 0.00  | 0.00 | 0.00 | 5.02  | 0.00  | 0.00  | 0.00 | 0.00  | 0.00 | 0.00 |
| ACGT     | 23.47 | 0.00  | 0.00  | 0.00 | 0.00  | 0.00 | 0.00 | 23.18 | 0.00  | 0.00  | 0.00 | 0.00  | 0.00 | 0.00 |
| ACTT     | 0.00  | 0.00  | 0.00  | 5.43 | 0.00  | 0.00 | 0.00 | 0.00  | 0.00  | 0.00  | 5.47 | 0.00  | 0.00 | 0.00 |
| CCAT     | 0.00  | 0.00  | 0.00  | 6.02 | 0.00  | 0.00 | 0.00 | 0.00  | 0.00  | 0.00  | 6.02 | 0.00  | 0.00 | 0.00 |
| CCCT     | 0.00  | 0.00  | 0.00  | 5.59 | 0.00  | 0.00 | 0.00 | 0.00  | 0.00  | 0.00  | 5.63 | 0.00  | 0.00 | 0.00 |
| CCGT     | 17.66 | 0.00  | 0.00  | 0.00 | 0.00  | 0.00 | 0.00 | 17.12 | 0.00  | 0.00  | 0.00 | 0.00  | 0.00 | 0.00 |
| CCTT     | 0.00  | 0.00  | 0.00  | 7.01 | 0.00  | 0.00 | 0.00 | 0.00  | 0.00  | 0.00  | 7.04 | 0.00  | 0.00 | 0.00 |
| GCAT     | 0.00  | 0.00  | 0.00  | 5.98 | 0.00  | 0.00 | 0.00 | 0.00  | 0.00  | 0.00  | 6.01 | 0.00  | 0.00 | 0.00 |
| GCCT     | 5.74  | 0.00  | 0.00  | 0.00 | 0.00  | 0.00 | 0.00 | 5.93  | 0.00  | 0.00  | 0.00 | 0.00  | 0.00 | 0.00 |
| GCGT     | 20.46 | 0.00  | 0.00  | 0.00 | 0.00  | 0.00 | 0.00 | 19.80 | 0.00  | 0.00  | 0.00 | 0.00  | 0.00 | 0.00 |
| GCTT     | 0.00  | 0.00  | 0.00  | 5.88 | 0.00  | 0.00 | 0.00 | 0.00  | 0.00  | 0.00  | 5.93 | 0.00  | 0.00 | 0.00 |
| TCAT     | 11.42 | 0.00  | 0.00  | 0.00 | 0.00  | 0.00 | 0.00 | 12.00 | 0.00  | 0.00  | 0.00 | 0.00  | 0.00 | 0.00 |
| TCCT     | 0.00  | 0.00  | 0.00  | 7.81 | 0.00  | 0.00 | 0.00 | 0.00  | 0.00  | 0.00  | 7.76 | 0.00  | 0.00 | 0.00 |
| TCGT     | 12.42 | 0.00  | 0.00  | 0.00 | 0.00  | 0.00 | 0.00 | 12.30 | 0.00  | 0.00  | 0.00 | 0.00  | 0.00 | 0.00 |
| TCTT     | 0.00  | 0.00  | 0.00  | 9.47 | 0.00  | 0.00 | 0.00 | 0.00  | 0.00  | 0.00  | 9.29 | 0.00  | 0.00 | 0.00 |

Table S8: Table S7 continued: weights for the next 48 mutation categories.

| Mutation | CI-1 | CI-2  | CI-3  | CI-4 | CI-5 | CI-6  | CI-7 | CI-1 | CI-2  | CI-3  | CI-4 | CI-5 | CI-6 | CI-7 |
|----------|------|-------|-------|------|------|-------|------|------|-------|-------|------|------|------|------|
| ATAA     | 0.00 | 0.00  | 0.00  | 0.00 | 4.18 | 0.00  | 0.00 | 0.00 | 0.00  | 0.00  | 0.00 | 4.52 | 0.00 | 0.00 |
| ATCA     | 0.00 | 0.00  | 8.99  | 0.00 | 0.00 | 0.00  | 0.00 | 0.00 | 0.00  | 9.10  | 0.00 | 0.00 | 0.00 | 0.00 |
| ATGA     | 0.00 | 0.00  | 0.00  | 0.00 | 4.02 | 0.00  | 0.00 | 0.00 | 0.00  | 0.00  | 0.00 | 4.30 | 0.00 | 0.00 |
| ATTA     | 0.00 | 0.00  | 0.00  | 0.00 | 0.00 | 5.72  | 0.00 | 0.00 | 0.00  | 0.00  | 0.00 | 0.00 | 5.85 | 0.00 |
| CTAA     | 0.00 | 0.00  | 10.32 | 0.00 | 0.00 | 0.00  | 0.00 | 0.00 | 0.00  | 9.83  | 0.00 | 0.00 | 0.00 | 0.00 |
| CTCA     | 0.00 | 0.00  | 0.00  | 0.00 | 3.79 | 0.00  | 0.00 | 0.00 | 0.00  | 0.00  | 0.00 | 3.98 | 0.00 | 0.00 |
| CTGA     | 0.00 | 0.00  | 0.00  | 0.00 | 4.88 | 0.00  | 0.00 | 0.00 | 0.00  | 0.00  | 0.00 | 5.02 | 0.00 | 0.00 |
| CTTA     | 0.00 | 0.00  | 0.00  | 0.00 | 0.00 | 4.42  | 0.00 | 0.00 | 0.00  | 0.00  | 0.00 | 0.00 | 4.47 | 0.00 |
| GTAA     | 0.00 | 0.00  | 0.00  | 0.00 | 0.00 | 0.00  | 4.30 | 0.00 | 0.00  | 0.00  | 0.00 | 0.00 | 0.00 | 4.35 |
| GTCA     | 0.00 | 15.20 | 0.00  | 0.00 | 0.00 | 0.00  | 0.00 | 0.00 | 15.36 | 0.00  | 0.00 | 0.00 | 0.00 | 0.00 |
| GTGA     | 0.00 | 0.00  | 8.23  | 0.00 | 0.00 | 0.00  | 0.00 | 0.00 | 0.00  | 8.16  | 0.00 | 0.00 | 0.00 | 0.00 |
| GTTA     | 0.00 | 0.00  | 0.00  | 0.00 | 0.00 | 0.00  | 5.13 | 0.00 | 0.00  | 0.00  | 0.00 | 0.00 | 0.00 | 5.19 |
| TTAA     | 0.00 | 0.00  | 0.00  | 0.00 | 0.00 | 5.30  | 0.00 | 0.00 | 0.00  | 0.00  | 0.00 | 0.00 | 5.43 | 0.00 |
| TTCA     | 0.00 | 0.00  | 0.00  | 0.00 | 0.00 | 0.00  | 6.64 | 0.00 | 0.00  | 0.00  | 0.00 | 0.00 | 0.00 | 6.58 |
| TTGA     | 0.00 | 0.00  | 7.82  | 0.00 | 0.00 | 0.00  | 0.00 | 0.00 | 0.00  | 7.57  | 0.00 | 0.00 | 0.00 | 0.00 |
| TTTA     | 0.00 | 0.00  | 0.00  | 0.00 | 0.00 | 5.44  | 0.00 | 0.00 | 0.00  | 0.00  | 0.00 | 0.00 | 5.55 | 0.00 |
| ATAC     | 0.00 | 0.00  | 0.00  | 7.03 | 0.00 | 0.00  | 0.00 | 0.00 | 0.00  | 0.00  | 7.06 | 0.00 | 0.00 | 0.00 |
| ATCC     | 0.00 | 0.00  | 10.75 | 0.00 | 0.00 | 0.00  | 0.00 | 0.00 | 0.00  | 10.92 | 0.00 | 0.00 | 0.00 | 0.00 |
| ATGC     | 0.00 | 0.00  | 0.00  | 4.97 | 0.00 | 0.00  | 0.00 | 0.00 | 0.00  | 0.00  | 4.98 | 0.00 | 0.00 | 0.00 |
| ATTC     | 0.00 | 0.00  | 0.00  | 6.30 | 0.00 | 0.00  | 0.00 | 0.00 | 0.00  | 0.00  | 6.34 | 0.00 | 0.00 | 0.00 |
| CTAC     | 0.00 | 0.00  | 0.00  | 0.00 | 0.00 | 3.91  | 0.00 | 0.00 | 0.00  | 0.00  | 0.00 | 0.00 | 3.94 | 0.00 |
| CTCC     | 0.00 | 0.00  | 0.00  | 0.00 | 0.00 | 4.44  | 0.00 | 0.00 | 0.00  | 0.00  | 0.00 | 0.00 | 4.45 | 0.00 |
| CTGC     | 0.00 | 0.00  | 0.00  | 0.00 | 0.00 | 5.56  | 0.00 | 0.00 | 0.00  | 0.00  | 0.00 | 0.00 | 5.61 | 0.00 |
| CTTC     | 0.00 | 0.00  | 0.00  | 0.00 | 0.00 | 7.39  | 0.00 | 0.00 | 0.00  | 0.00  | 0.00 | 0.00 | 7.16 | 0.00 |
| GTAC     | 0.00 | 0.00  | 0.00  | 0.00 | 0.00 | 5.00  | 0.00 | 0.00 | 0.00  | 0.00  | 0.00 | 0.00 | 5.14 | 0.00 |
| GTCC     | 0.00 | 0.00  | 10.41 | 0.00 | 0.00 | 0.00  | 0.00 | 0.00 | 0.00  | 10.61 | 0.00 | 0.00 | 0.00 | 0.00 |
| GTGC     | 0.00 | 0.00  | 0.00  | 0.00 | 0.00 | 4.47  | 0.00 | 0.00 | 0.00  | 0.00  | 0.00 | 0.00 | 4.59 | 0.00 |
| GTTC     | 0.00 | 0.00  | 0.00  | 0.00 | 0.00 | 5.21  | 0.00 | 0.00 | 0.00  | 0.00  | 0.00 | 0.00 | 5.40 | 0.00 |
| TTAC     | 0.00 | 0.00  | 0.00  | 0.00 | 0.00 | 5.13  | 0.00 | 0.00 | 0.00  | 0.00  | 0.00 | 0.00 | 5.26 | 0.00 |
| TTCC     | 0.00 | 0.00  | 0.00  | 0.00 | 0.00 | 4.84  | 0.00 | 0.00 | 0.00  | 0.00  | 0.00 | 0.00 | 4.96 | 0.00 |
| TTGC     | 0.00 | 0.00  | 10.48 | 0.00 | 0.00 | 0.00  | 0.00 | 0.00 | 0.00  | 10.62 | 0.00 | 0.00 | 0.00 | 0.00 |
| TTTC     | 0.00 | 0.00  | 0.00  | 0.00 | 0.00 | 7.53  | 0.00 | 0.00 | 0.00  | 0.00  | 0.00 | 0.00 | 7.52 | 0.00 |
| ATAG     | 0.00 | 0.00  | 0.00  | 0.00 | 0.00 | 0.00  | 3.98 | 0.00 | 0.00  | 0.00  | 0.00 | 0.00 | 0.00 | 4.09 |
| ATCG     | 0.00 | 0.00  | 0.00  | 0.00 | 0.00 | 0.00  | 3.81 | 0.00 | 0.00  | 0.00  | 0.00 | 0.00 | 0.00 | 3.70 |
| ATGG     | 0.00 | 0.00  | 0.00  | 0.00 | 0.00 | 0.00  | 3.97 | 0.00 | 0.00  | 0.00  | 0.00 | 0.00 | 0.00 | 3.99 |
| ATTG     | 0.00 | 0.00  | 0.00  | 0.00 | 0.00 | 0.00  | 7.13 | 0.00 | 0.00  | 0.00  | 0.00 | 0.00 | 0.00 | 7.08 |
| CTAG     | 0.00 | 0.00  | 0.00  | 0.00 | 0.00 | 0.00  | 3.55 | 0.00 | 0.00  | 0.00  | 0.00 | 0.00 | 0.00 | 3.56 |
| CTCG     | 0.00 | 0.00  | 0.00  | 0.00 | 0.00 | 0.00  | 6.52 | 0.00 | 0.00  | 0.00  | 0.00 | 0.00 | 0.00 | 6.31 |
| CTGG     | 0.00 | 0.00  | 0.00  | 0.00 | 0.00 | 0.00  | 3.67 | 0.00 | 0.00  | 0.00  | 0.00 | 0.00 | 0.00 | 3.83 |
| CTTG     | 0.00 | 0.00  | 0.00  | 0.00 | 0.00 | 10.06 | 0.00 | 0.00 | 0.00  | 0.00  | 0.00 | 0.00 | 9.27 | 0.00 |
| GTAG     | 0.00 | 0.00  | 0.00  | 0.00 | 0.00 | 0.00  | 3.58 | 0.00 | 0.00  | 0.00  | 0.00 | 0.00 | 0.00 | 3.49 |
| GTCG     | 0.00 | 7.80  | 0.00  | 0.00 | 0.00 | 0.00  | 0.00 | 0.00 | 8.11  | 0.00  | 0.00 | 0.00 | 0.00 | 0.00 |
| GTGG     | 0.00 | 0.00  | 0.00  | 0.00 | 0.00 | 0.00  | 3.82 | 0.00 | 0.00  | 0.00  | 0.00 | 0.00 | 0.00 | 3.98 |
| GTTG     | 0.00 | 0.00  | 0.00  | 0.00 | 0.00 | 0.00  | 7.02 | 0.00 | 0.00  | 0.00  | 0.00 | 0.00 | 0.00 | 6.97 |
| TTAG     | 0.00 | 0.00  | 0.00  | 0.00 | 0.00 | 0.00  | 4.24 | 0.00 | 0.00  | 0.00  | 0.00 | 0.00 | 0.00 | 4.43 |
| TTCC     | 0.00 | 0.00  | 0.00  | 0.00 | 0.00 | 0.00  | 3.73 | 0.00 | 0.00  | 0.00  | 0.00 | 0.00 | 0.00 | 3.75 |
| TTGC     | 0.00 | 0.00  | 0.00  | 0.00 | 0.00 | 0.00  | 6.10 | 0.00 | 0.00  | 0.00  | 0.00 | 0.00 | 0.00 | 6.06 |
| TTTG     | 0.00 | 0.00  | 0.00  | 0.00 | 0.00 | 8.61  | 0.00 | 0.00 | 0.00  | 0.00  | 0.00 | 0.00 | 8.36 | 0.00 |



Table S9: Weights for the first 48 mutation categories for the 6 clusters in Clustering-D (see Table S4). The conventions are the same as in Table 1.

| Mutation | Cl-1  | Cl-2  | Cl-3 | Cl-4  | Cl-5 | Cl-6 | Cl-1  | Cl-2  | Cl-3 | Cl-4  | Cl-5 | Cl-6 |
|----------|-------|-------|------|-------|------|------|-------|-------|------|-------|------|------|
| ACAA     | 0.00  | 0.00  | 6.55 | 0.00  | 0.00 | 0.00 | 0.00  | 0.00  | 6.55 | 0.00  | 0.00 | 0.00 |
| ACCA     | 0.00  | 0.00  | 0.00 | 5.83  | 0.00 | 0.00 | 0.00  | 0.00  | 0.00 | 6.08  | 0.00 | 0.00 |
| ACGA     | 0.00  | 0.00  | 0.00 | 0.00  | 0.00 | 2.75 | 0.00  | 0.00  | 0.00 | 0.00  | 0.00 | 2.63 |
| ACTA     | 0.00  | 0.00  | 0.00 | 6.16  | 0.00 | 0.00 | 0.00  | 0.00  | 0.00 | 6.38  | 0.00 | 0.00 |
| CCAA     | 0.00  | 0.00  | 0.00 | 7.91  | 0.00 | 0.00 | 0.00  | 0.00  | 0.00 | 8.10  | 0.00 | 0.00 |
| CCCA     | 0.00  | 0.00  | 0.00 | 6.46  | 0.00 | 0.00 | 0.00  | 0.00  | 0.00 | 6.68  | 0.00 | 0.00 |
| CCGA     | 0.00  | 0.00  | 0.00 | 0.00  | 0.00 | 2.13 | 0.00  | 0.00  | 0.00 | 0.00  | 0.00 | 2.25 |
| CCTA     | 0.00  | 0.00  | 0.00 | 0.00  | 6.75 | 0.00 | 0.00  | 0.00  | 0.00 | 0.00  | 6.79 | 0.00 |
| GCAA     | 4.05  | 0.00  | 0.00 | 0.00  | 0.00 | 0.00 | 4.65  | 0.00  | 0.00 | 0.00  | 0.00 | 0.00 |
| GCCA     | 0.00  | 0.00  | 0.00 | 4.56  | 0.00 | 0.00 | 0.00  | 0.00  | 0.00 | 4.73  | 0.00 | 0.00 |
| GCGA     | 0.00  | 13.81 | 0.00 | 0.00  | 0.00 | 0.00 | 0.00  | 13.89 | 0.00 | 0.00  | 0.00 | 0.00 |
| GCTA     | 0.00  | 0.00  | 0.00 | 5.02  | 0.00 | 0.00 | 0.00  | 0.00  | 0.00 | 5.20  | 0.00 | 0.00 |
| TCAA     | 0.00  | 0.00  | 6.26 | 0.00  | 0.00 | 0.00 | 0.00  | 0.00  | 6.21 | 0.00  | 0.00 | 0.00 |
| TCCA     | 0.00  | 0.00  | 0.00 | 8.94  | 0.00 | 0.00 | 0.00  | 0.00  | 0.00 | 9.29  | 0.00 | 0.00 |
| TCGA     | 0.00  | 11.87 | 0.00 | 0.00  | 0.00 | 0.00 | 0.00  | 12.24 | 0.00 | 0.00  | 0.00 | 0.00 |
| TCTA     | 0.00  | 0.00  | 8.05 | 0.00  | 0.00 | 0.00 | 0.00  | 0.00  | 8.00 | 0.00  | 0.00 | 0.00 |
| ACAG     | 0.00  | 0.00  | 0.00 | 3.96  | 0.00 | 0.00 | 0.00  | 0.00  | 0.00 | 4.18  | 0.00 | 0.00 |
| ACCG     | 0.00  | 0.00  | 0.00 | 0.00  | 0.00 | 2.46 | 0.00  | 0.00  | 0.00 | 0.00  | 0.00 | 2.61 |
| ACGG     | 0.00  | 12.62 | 0.00 | 0.00  | 0.00 | 0.00 | 0.00  | 12.22 | 0.00 | 0.00  | 0.00 | 0.00 |
| ACTG     | 0.00  | 0.00  | 0.00 | 4.77  | 0.00 | 0.00 | 0.00  | 0.00  | 0.00 | 5.03  | 0.00 | 0.00 |
| CCAG     | 0.00  | 0.00  | 0.00 | 0.00  | 0.00 | 2.81 | 0.00  | 0.00  | 0.00 | 0.00  | 0.00 | 2.98 |
| CCCG     | 0.00  | 0.00  | 0.00 | 0.00  | 0.00 | 2.88 | 0.00  | 0.00  | 0.00 | 0.00  | 0.00 | 2.92 |
| CCGG     | 0.00  | 0.00  | 0.00 | 0.00  | 0.00 | 3.29 | 0.00  | 0.00  | 0.00 | 0.00  | 0.00 | 2.97 |
| CCTG     | 0.00  | 0.00  | 0.00 | 0.00  | 0.00 | 3.84 | 0.00  | 0.00  | 0.00 | 0.00  | 0.00 | 4.05 |
| GCAG     | 0.00  | 0.00  | 0.00 | 0.00  | 0.00 | 3.13 | 0.00  | 0.00  | 0.00 | 0.00  | 0.00 | 3.02 |
| GCCG     | 0.00  | 14.79 | 0.00 | 0.00  | 0.00 | 0.00 | 0.00  | 15.62 | 0.00 | 0.00  | 0.00 | 0.00 |
| GCGG     | 0.00  | 15.50 | 0.00 | 0.00  | 0.00 | 0.00 | 0.00  | 13.92 | 0.00 | 0.00  | 0.00 | 0.00 |
| GCTG     | 0.00  | 0.00  | 0.00 | 0.00  | 0.00 | 3.44 | 0.00  | 0.00  | 0.00 | 0.00  | 0.00 | 3.42 |
| TCAG     | 0.00  | 0.00  | 0.00 | 10.31 | 0.00 | 0.00 | 0.00  | 0.00  | 0.00 | 9.03  | 0.00 | 0.00 |
| TCCG     | 0.00  | 0.00  | 0.00 | 5.10  | 0.00 | 0.00 | 0.00  | 0.00  | 0.00 | 4.95  | 0.00 | 0.00 |
| TCCG     | 0.00  | 8.40  | 0.00 | 0.00  | 0.00 | 0.00 | 0.00  | 8.65  | 0.00 | 0.00  | 0.00 | 0.00 |
| TCTG     | 0.00  | 0.00  | 0.00 | 14.10 | 0.00 | 0.00 | 0.00  | 0.00  | 0.00 | 12.53 | 0.00 | 0.00 |
| ACAT     | 0.00  | 0.00  | 7.67 | 0.00  | 0.00 | 0.00 | 0.00  | 0.00  | 7.71 | 0.00  | 0.00 | 0.00 |
| ACCT     | 4.78  | 0.00  | 0.00 | 0.00  | 0.00 | 0.00 | 5.02  | 0.00  | 0.00 | 0.00  | 0.00 | 0.00 |
| ACGT     | 23.47 | 0.00  | 0.00 | 0.00  | 0.00 | 0.00 | 23.18 | 0.00  | 0.00 | 0.00  | 0.00 | 0.00 |
| ACTT     | 0.00  | 0.00  | 5.43 | 0.00  | 0.00 | 0.00 | 0.00  | 0.00  | 5.47 | 0.00  | 0.00 | 0.00 |
| CCAT     | 0.00  | 0.00  | 6.02 | 0.00  | 0.00 | 0.00 | 0.00  | 0.00  | 6.02 | 0.00  | 0.00 | 0.00 |
| CCCT     | 0.00  | 0.00  | 5.59 | 0.00  | 0.00 | 0.00 | 0.00  | 0.00  | 5.63 | 0.00  | 0.00 | 0.00 |
| CCGT     | 17.66 | 0.00  | 0.00 | 0.00  | 0.00 | 0.00 | 17.12 | 0.00  | 0.00 | 0.00  | 0.00 | 0.00 |
| CCTT     | 0.00  | 0.00  | 7.01 | 0.00  | 0.00 | 0.00 | 0.00  | 0.00  | 7.04 | 0.00  | 0.00 | 0.00 |
| GCAT     | 0.00  | 0.00  | 5.98 | 0.00  | 0.00 | 0.00 | 0.00  | 0.00  | 6.01 | 0.00  | 0.00 | 0.00 |
| GCCT     | 5.74  | 0.00  | 0.00 | 0.00  | 0.00 | 0.00 | 5.93  | 0.00  | 0.00 | 0.00  | 0.00 | 0.00 |
| GCGT     | 20.46 | 0.00  | 0.00 | 0.00  | 0.00 | 0.00 | 19.80 | 0.00  | 0.00 | 0.00  | 0.00 | 0.00 |
| GCTT     | 0.00  | 0.00  | 5.88 | 0.00  | 0.00 | 0.00 | 0.00  | 0.00  | 5.93 | 0.00  | 0.00 | 0.00 |
| TCAT     | 11.42 | 0.00  | 0.00 | 0.00  | 0.00 | 0.00 | 12.00 | 0.00  | 0.00 | 0.00  | 0.00 | 0.00 |
| TCCT     | 0.00  | 0.00  | 7.81 | 0.00  | 0.00 | 0.00 | 0.00  | 0.00  | 7.76 | 0.00  | 0.00 | 0.00 |
| TCGT     | 12.42 | 0.00  | 0.00 | 0.00  | 0.00 | 0.00 | 12.30 | 0.00  | 0.00 | 0.00  | 0.00 | 0.00 |
| TCTT     | 0.00  | 0.00  | 9.47 | 0.00  | 0.00 | 0.00 | 0.00  | 0.00  | 9.29 | 0.00  | 0.00 | 0.00 |

Table S10: Table S9 continued: weights for the next 48 mutation categories.

| Mutation | CI-1 | CI-2  | CI-3 | CI-4 | CI-5 | CI-6 | CI-1 | CI-2  | CI-3 | CI-4 | CI-5 | CI-6 |
|----------|------|-------|------|------|------|------|------|-------|------|------|------|------|
| ATAA     | 0.00 | 0.00  | 0.00 | 4.18 | 0.00 | 0.00 | 0.00 | 0.00  | 0.00 | 4.52 | 0.00 | 0.00 |
| ATCA     | 0.00 | 0.00  | 0.00 | 0.00 | 0.00 | 3.11 | 0.00 | 0.00  | 0.00 | 0.00 | 0.00 | 3.29 |
| ATGA     | 0.00 | 0.00  | 0.00 | 4.02 | 0.00 | 0.00 | 0.00 | 0.00  | 0.00 | 4.30 | 0.00 | 0.00 |
| ATTA     | 0.00 | 0.00  | 0.00 | 0.00 | 5.54 | 0.00 | 0.00 | 0.00  | 0.00 | 0.00 | 5.66 | 0.00 |
| CTAA     | 0.00 | 0.00  | 0.00 | 0.00 | 0.00 | 3.49 | 0.00 | 0.00  | 0.00 | 0.00 | 0.00 | 3.60 |
| CTCA     | 0.00 | 0.00  | 0.00 | 3.79 | 0.00 | 0.00 | 0.00 | 0.00  | 0.00 | 3.98 | 0.00 | 0.00 |
| CTGA     | 0.00 | 0.00  | 0.00 | 4.88 | 0.00 | 0.00 | 0.00 | 0.00  | 0.00 | 5.02 | 0.00 | 0.00 |
| CTTA     | 0.00 | 0.00  | 0.00 | 0.00 | 4.28 | 0.00 | 0.00 | 0.00  | 0.00 | 0.00 | 4.33 | 0.00 |
| GTAA     | 0.00 | 0.00  | 0.00 | 0.00 | 0.00 | 3.09 | 0.00 | 0.00  | 0.00 | 0.00 | 0.00 | 3.04 |
| GTCA     | 0.00 | 15.20 | 0.00 | 0.00 | 0.00 | 0.00 | 0.00 | 15.36 | 0.00 | 0.00 | 0.00 | 0.00 |
| GTGA     | 0.00 | 0.00  | 0.00 | 0.00 | 0.00 | 2.79 | 0.00 | 0.00  | 0.00 | 0.00 | 0.00 | 2.93 |
| GTTA     | 0.00 | 0.00  | 0.00 | 0.00 | 0.00 | 3.65 | 0.00 | 0.00  | 0.00 | 0.00 | 0.00 | 3.63 |
| TTAA     | 0.00 | 0.00  | 0.00 | 0.00 | 5.13 | 0.00 | 0.00 | 0.00  | 0.00 | 0.00 | 5.26 | 0.00 |
| TTCA     | 0.00 | 0.00  | 0.00 | 0.00 | 0.00 | 4.50 | 0.00 | 0.00  | 0.00 | 0.00 | 0.00 | 4.33 |
| TTGA     | 0.00 | 0.00  | 0.00 | 0.00 | 0.00 | 2.63 | 0.00 | 0.00  | 0.00 | 0.00 | 0.00 | 2.74 |
| TTTA     | 0.00 | 0.00  | 0.00 | 0.00 | 5.27 | 0.00 | 0.00 | 0.00  | 0.00 | 0.00 | 5.38 | 0.00 |
| ATAC     | 0.00 | 0.00  | 7.03 | 0.00 | 0.00 | 0.00 | 0.00 | 0.00  | 7.06 | 0.00 | 0.00 | 0.00 |
| ATCC     | 0.00 | 0.00  | 0.00 | 0.00 | 3.30 | 0.00 | 0.00 | 0.00  | 0.00 | 0.00 | 3.39 | 0.00 |
| ATGC     | 0.00 | 0.00  | 4.97 | 0.00 | 0.00 | 0.00 | 0.00 | 0.00  | 4.98 | 0.00 | 0.00 | 0.00 |
| ATTC     | 0.00 | 0.00  | 6.30 | 0.00 | 0.00 | 0.00 | 0.00 | 0.00  | 6.34 | 0.00 | 0.00 | 0.00 |
| CTAC     | 0.00 | 0.00  | 0.00 | 0.00 | 3.78 | 0.00 | 0.00 | 0.00  | 0.00 | 0.00 | 3.81 | 0.00 |
| CTCC     | 0.00 | 0.00  | 0.00 | 0.00 | 4.30 | 0.00 | 0.00 | 0.00  | 0.00 | 0.00 | 4.31 | 0.00 |
| CTGC     | 0.00 | 0.00  | 0.00 | 0.00 | 5.37 | 0.00 | 0.00 | 0.00  | 0.00 | 0.00 | 5.41 | 0.00 |
| CTTC     | 0.00 | 0.00  | 0.00 | 0.00 | 7.14 | 0.00 | 0.00 | 0.00  | 0.00 | 0.00 | 6.92 | 0.00 |
| GTAC     | 0.00 | 0.00  | 0.00 | 0.00 | 4.84 | 0.00 | 0.00 | 0.00  | 0.00 | 0.00 | 4.96 | 0.00 |
| GTCC     | 0.00 | 0.00  | 0.00 | 0.00 | 0.00 | 3.81 | 0.00 | 0.00  | 0.00 | 0.00 | 0.00 | 3.95 |
| GTGC     | 0.00 | 0.00  | 0.00 | 0.00 | 4.32 | 0.00 | 0.00 | 0.00  | 0.00 | 0.00 | 4.43 | 0.00 |
| GTTC     | 0.00 | 0.00  | 0.00 | 0.00 | 5.05 | 0.00 | 0.00 | 0.00  | 0.00 | 0.00 | 5.23 | 0.00 |
| TTAC     | 0.00 | 0.00  | 0.00 | 0.00 | 4.97 | 0.00 | 0.00 | 0.00  | 0.00 | 0.00 | 5.10 | 0.00 |
| TTCC     | 0.00 | 0.00  | 0.00 | 0.00 | 4.69 | 0.00 | 0.00 | 0.00  | 0.00 | 0.00 | 4.79 | 0.00 |
| TTGC     | 0.00 | 0.00  | 0.00 | 0.00 | 0.00 | 3.61 | 0.00 | 0.00  | 0.00 | 0.00 | 0.00 | 3.80 |
| TTTC     | 0.00 | 0.00  | 0.00 | 0.00 | 7.29 | 0.00 | 0.00 | 0.00  | 0.00 | 0.00 | 7.28 | 0.00 |
| ATAG     | 0.00 | 0.00  | 0.00 | 0.00 | 0.00 | 2.91 | 0.00 | 0.00  | 0.00 | 0.00 | 0.00 | 2.95 |
| ATCG     | 0.00 | 0.00  | 0.00 | 0.00 | 0.00 | 2.46 | 0.00 | 0.00  | 0.00 | 0.00 | 0.00 | 2.30 |
| ATGG     | 0.00 | 0.00  | 0.00 | 0.00 | 0.00 | 2.80 | 0.00 | 0.00  | 0.00 | 0.00 | 0.00 | 2.76 |
| ATTG     | 0.00 | 0.00  | 0.00 | 0.00 | 0.00 | 4.93 | 0.00 | 0.00  | 0.00 | 0.00 | 0.00 | 4.79 |
| CTAG     | 0.00 | 0.00  | 0.00 | 0.00 | 0.00 | 2.47 | 0.00 | 0.00  | 0.00 | 0.00 | 0.00 | 2.43 |
| CTCG     | 0.00 | 0.00  | 0.00 | 0.00 | 0.00 | 4.21 | 0.00 | 0.00  | 0.00 | 0.00 | 0.00 | 3.93 |
| CTGG     | 0.00 | 0.00  | 0.00 | 0.00 | 0.00 | 2.80 | 0.00 | 0.00  | 0.00 | 0.00 | 0.00 | 2.90 |
| CTTG     | 0.00 | 0.00  | 0.00 | 0.00 | 9.67 | 0.00 | 0.00 | 0.00  | 0.00 | 0.00 | 8.89 | 0.00 |
| GTAG     | 0.00 | 0.00  | 0.00 | 0.00 | 0.00 | 2.30 | 0.00 | 0.00  | 0.00 | 0.00 | 0.00 | 2.16 |
| GTCG     | 0.00 | 7.80  | 0.00 | 0.00 | 0.00 | 0.00 | 0.00 | 8.11  | 0.00 | 0.00 | 0.00 | 0.00 |
| GTGG     | 0.00 | 0.00  | 0.00 | 0.00 | 0.00 | 2.85 | 0.00 | 0.00  | 0.00 | 0.00 | 0.00 | 2.93 |
| GTTG     | 0.00 | 0.00  | 0.00 | 0.00 | 0.00 | 4.83 | 0.00 | 0.00  | 0.00 | 0.00 | 0.00 | 4.73 |
| TTAG     | 0.00 | 0.00  | 0.00 | 0.00 | 0.00 | 3.20 | 0.00 | 0.00  | 0.00 | 0.00 | 0.00 | 3.30 |
| TTCC     | 0.00 | 0.00  | 0.00 | 0.00 | 0.00 | 2.64 | 0.00 | 0.00  | 0.00 | 0.00 | 0.00 | 2.60 |
| TTGC     | 0.00 | 0.00  | 0.00 | 0.00 | 0.00 | 4.20 | 0.00 | 0.00  | 0.00 | 0.00 | 0.00 | 4.08 |
| TTTG     | 0.00 | 0.00  | 0.00 | 0.00 | 8.31 | 0.00 | 0.00 | 0.00  | 0.00 | 0.00 | 8.05 | 0.00 |











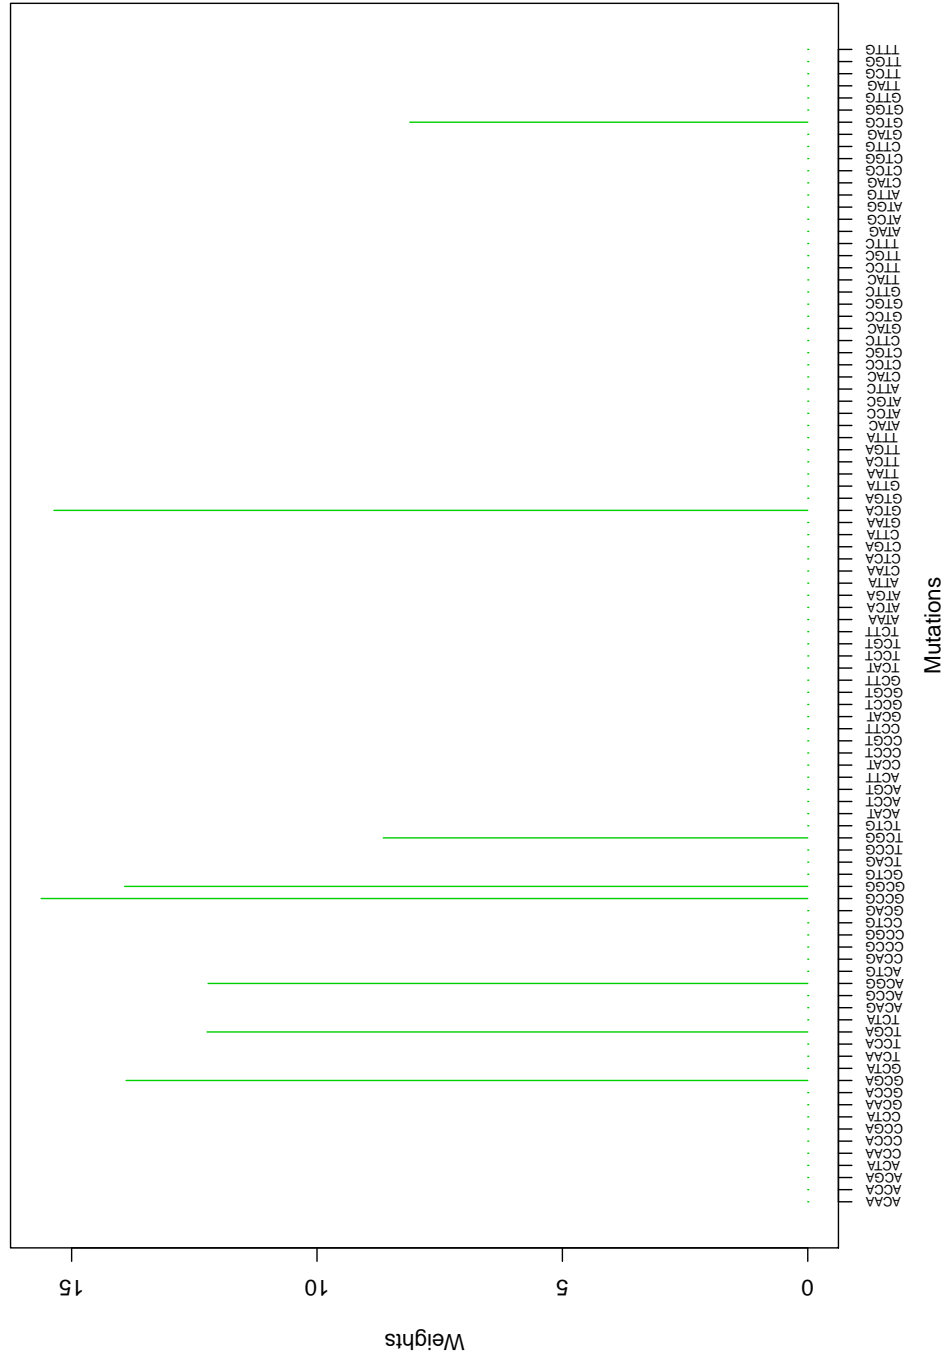

Figure S6: Cluster Cl-3 in Clustering-B with weights based on normalized regressions with arithmetic means (see Subsection 2.6). See Tables S4, S5, S6.













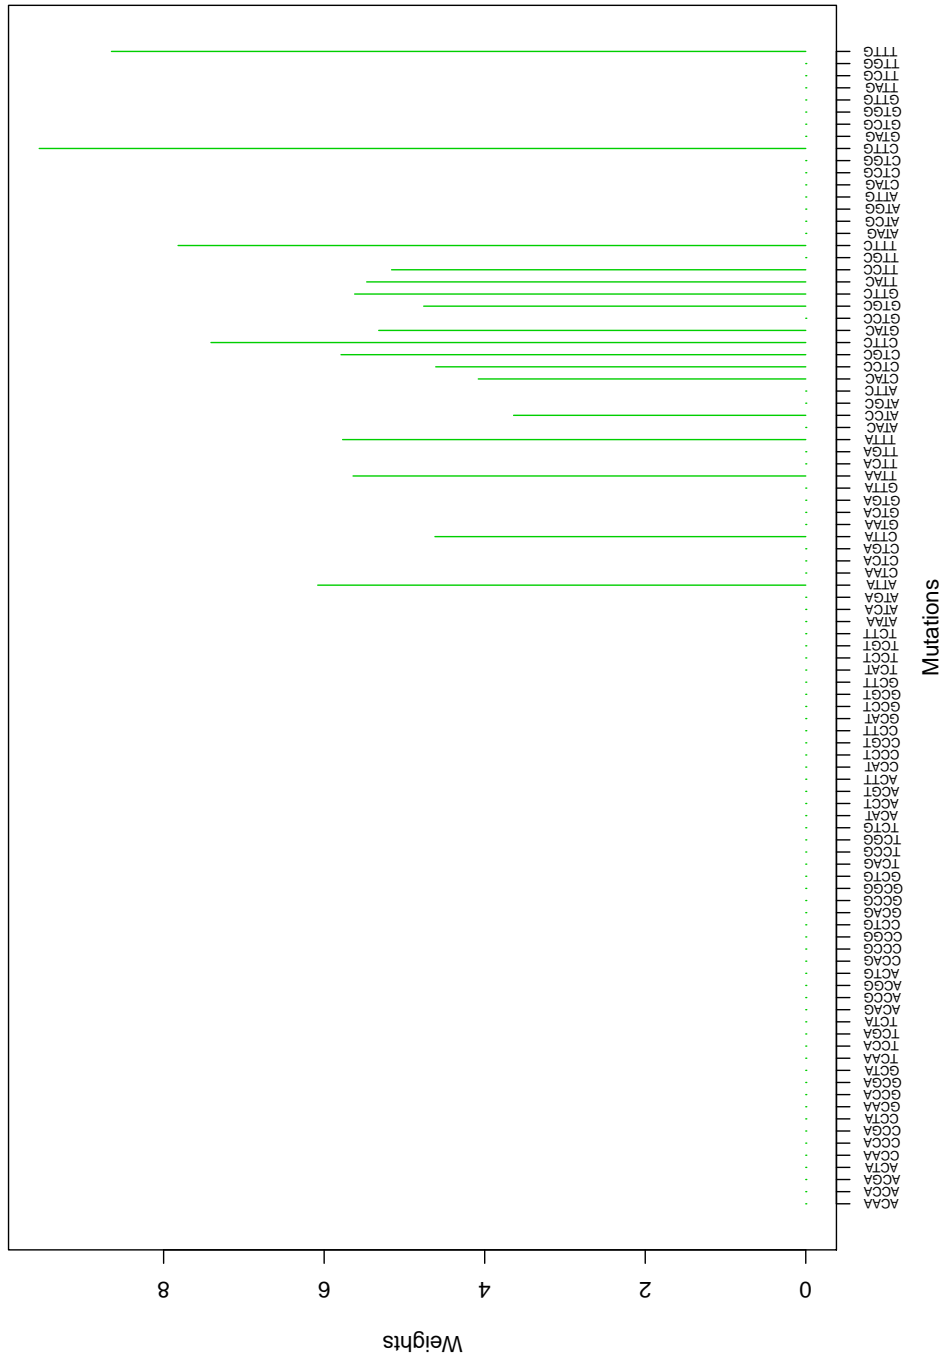

Figure S12: Cluster Cl-6 in Clustering-B with weights based on normalized regressions with arithmetic means (see Subsection 2.6). See Tables S4, S5, S6.



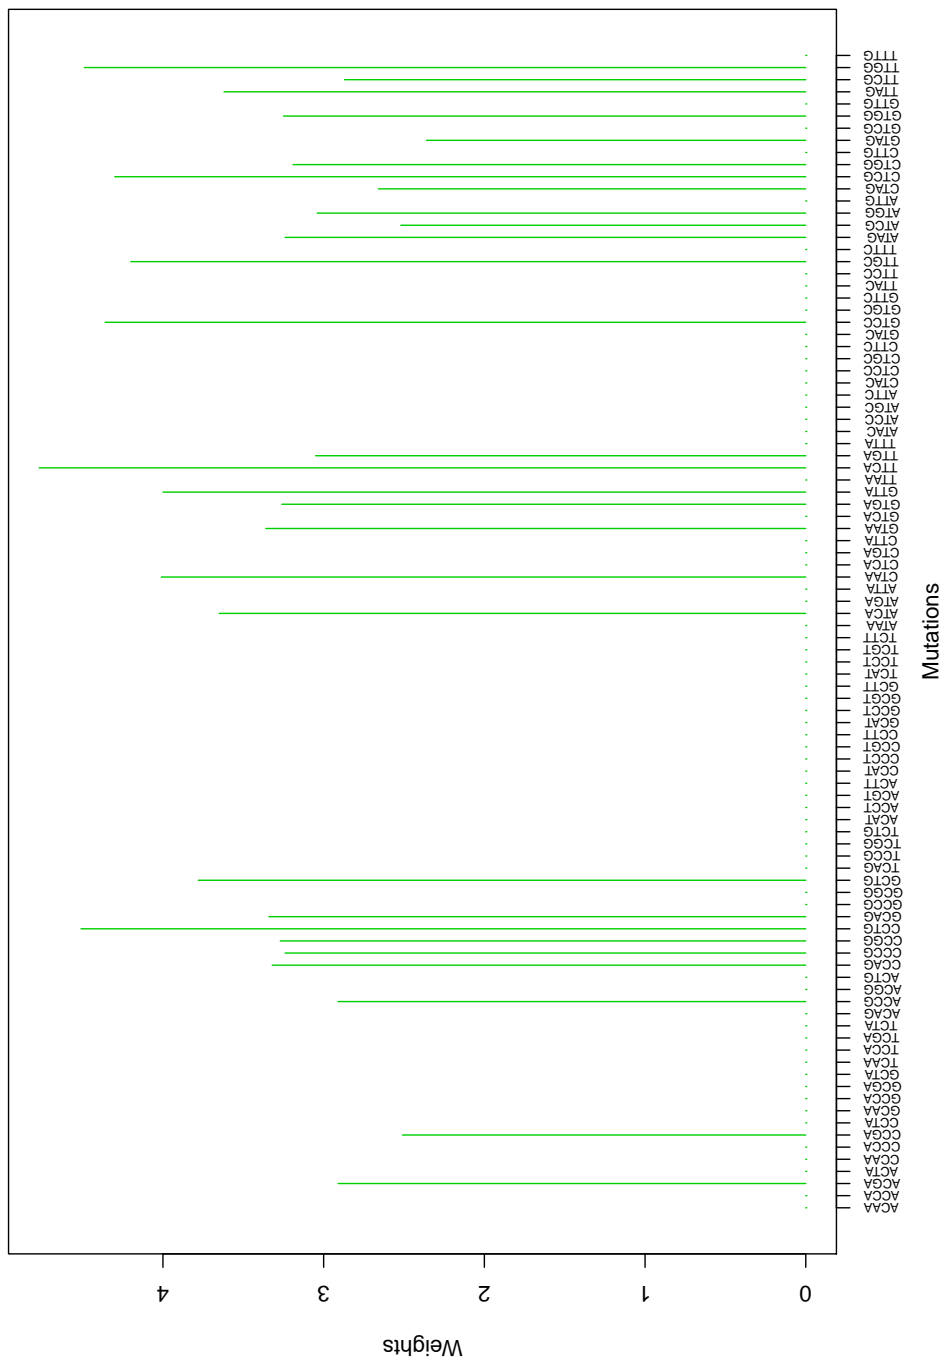

Figure S14: Cluster CI-7 in Clustering-B with weights based on normalized regressions with arithmetic means (see Subsection 2.6). See Tables S4, S5, S6.



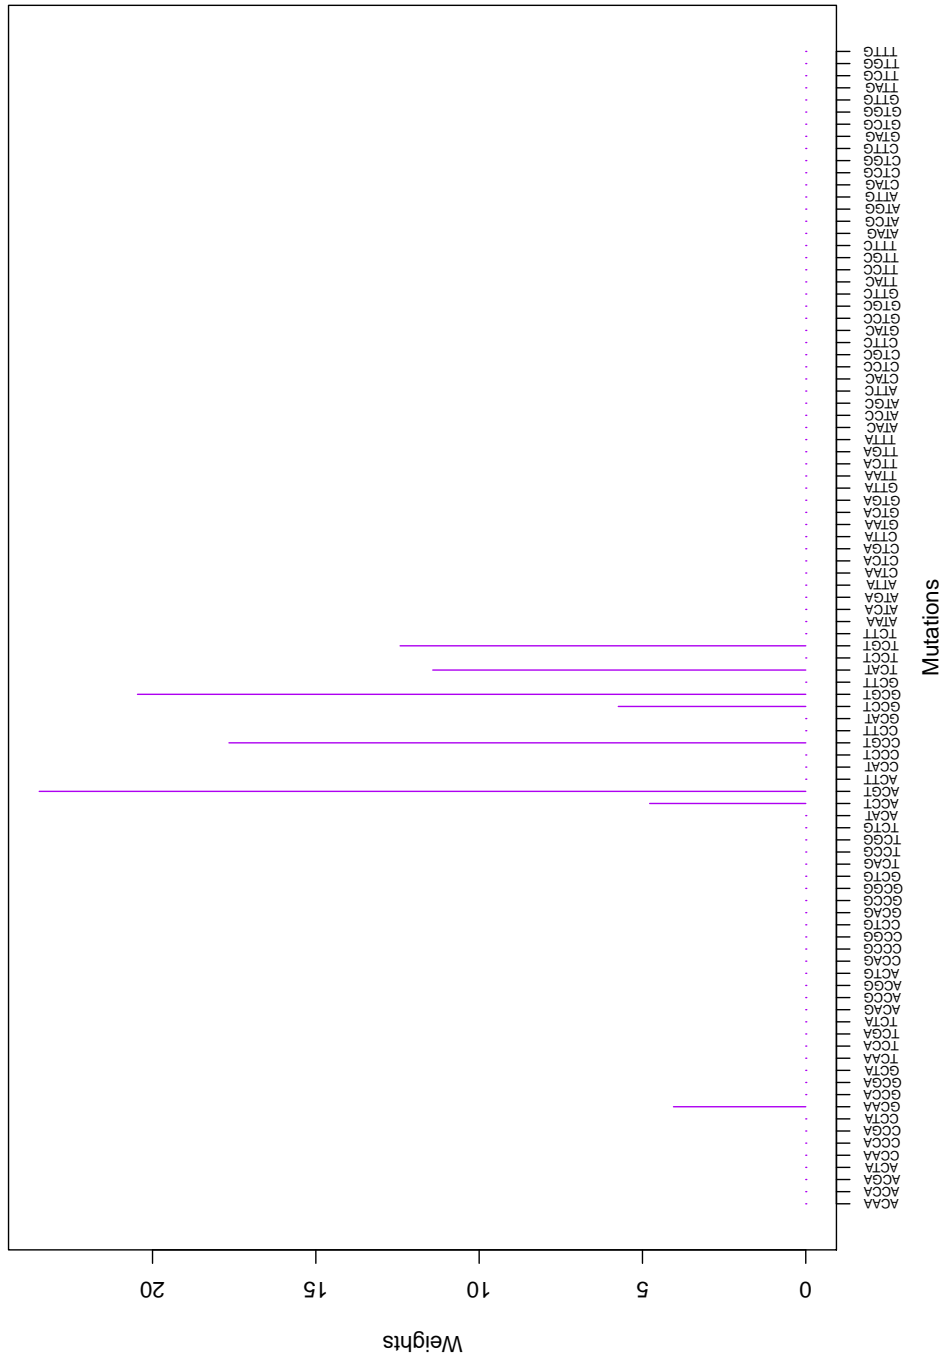

Figure S15: Cluster Cl-1 in Clustering-C with weights based on unnormalized regressions with arithmetic means (see Subsection 2.6). See Tables S4, S7, S8.

















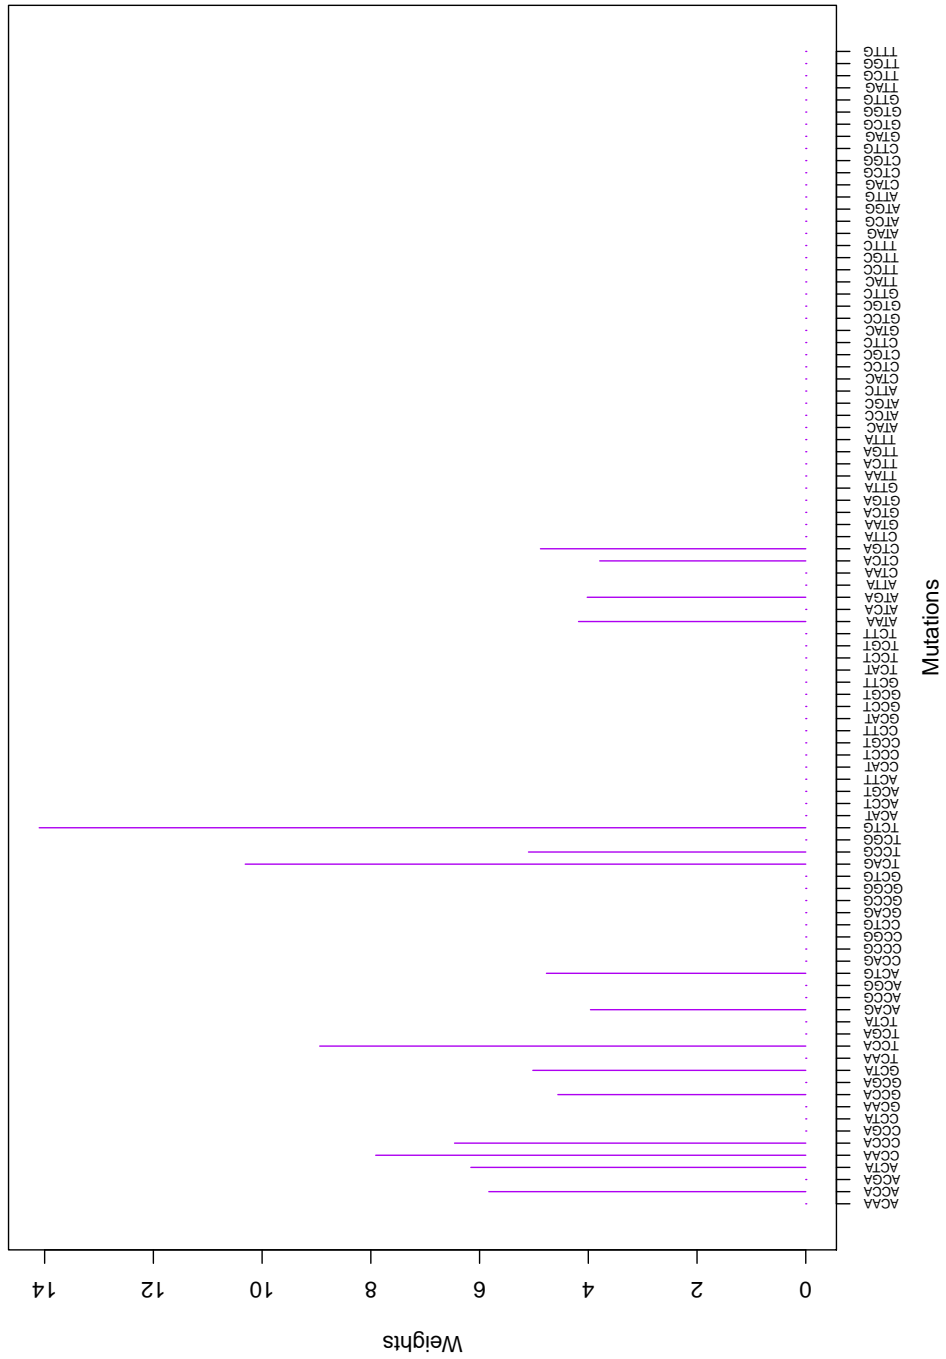

Figure S23: Cluster Cl-5 in Clustering-C with weights based on unnormalized regressions with arithmetic means (see Subsection 2.6). See Tables S4, S7, S8.









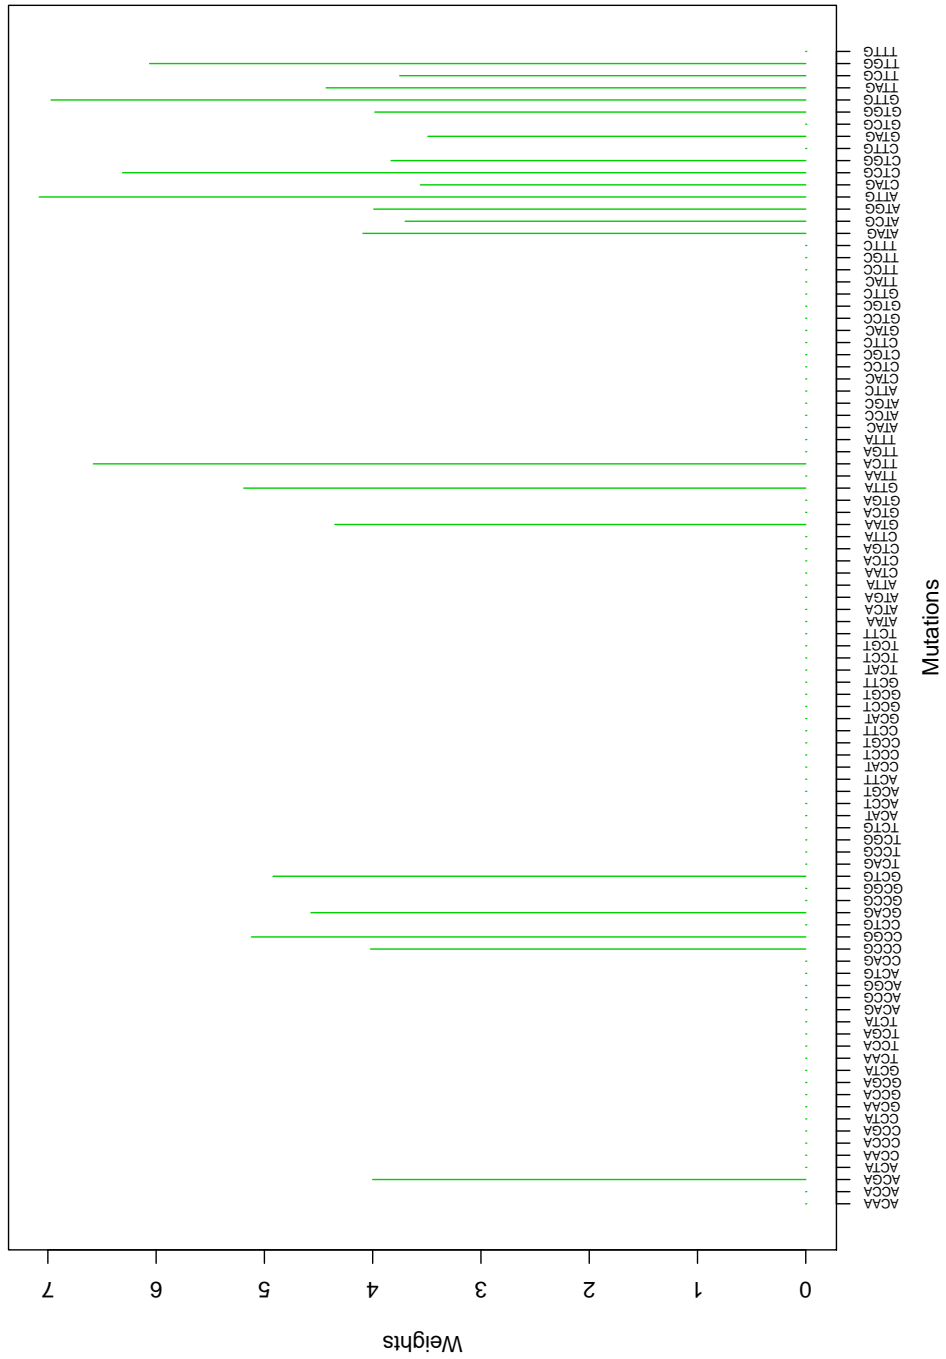

Figure S28: Cluster Cl-7 in Clustering-C with weights based on normalized regressions with arithmetic means (see Subsection 2.6). See Tables S4, S7, S8.



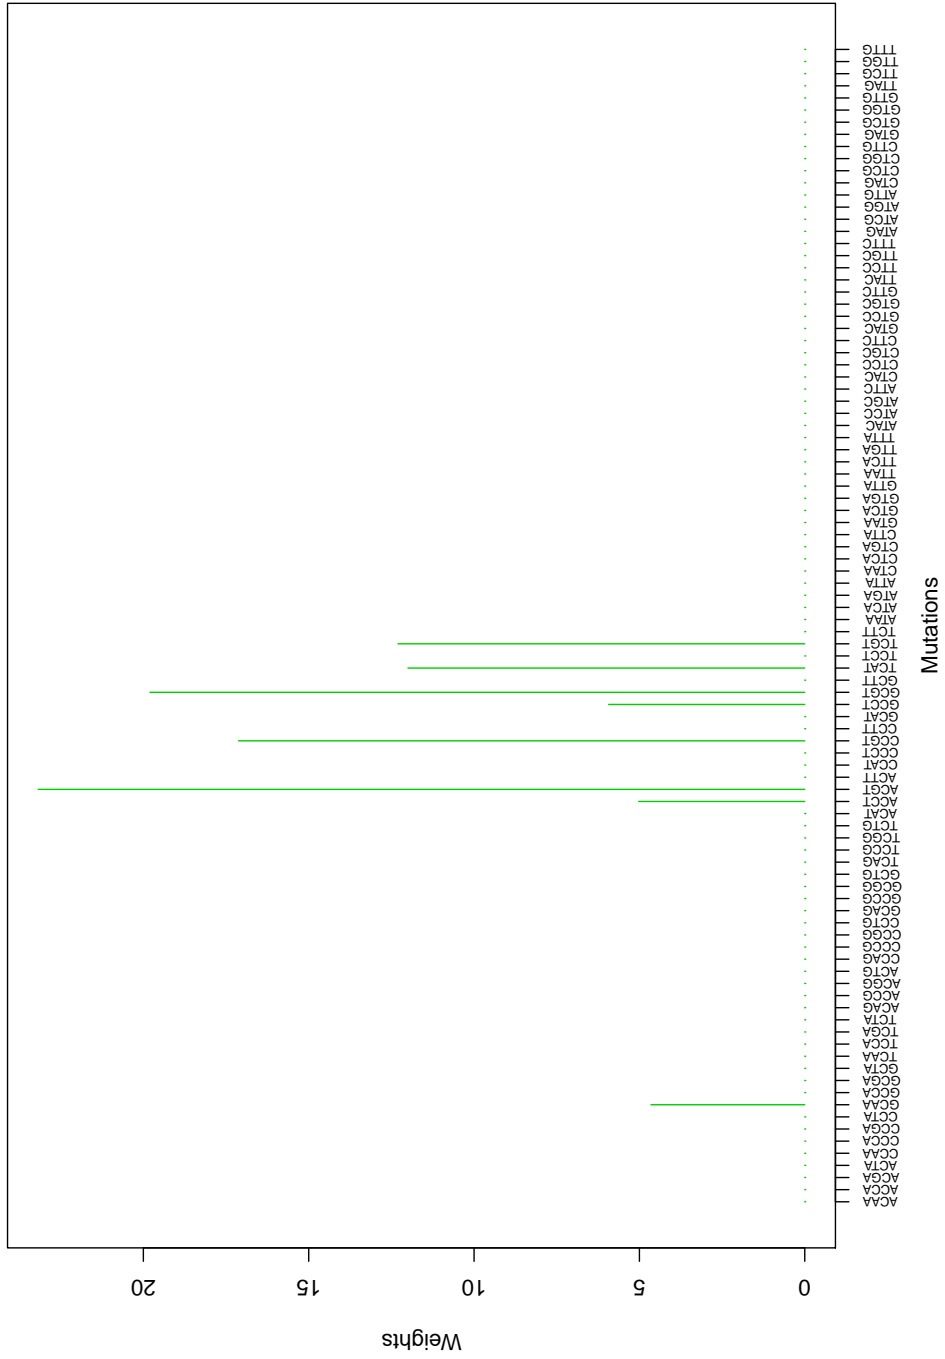

Figure S30: Cluster CI-1 in Clustering-D with weights based on normalized regressions with arithmetic means (see Subsection 2.6). See Tables S4, S9, S10.













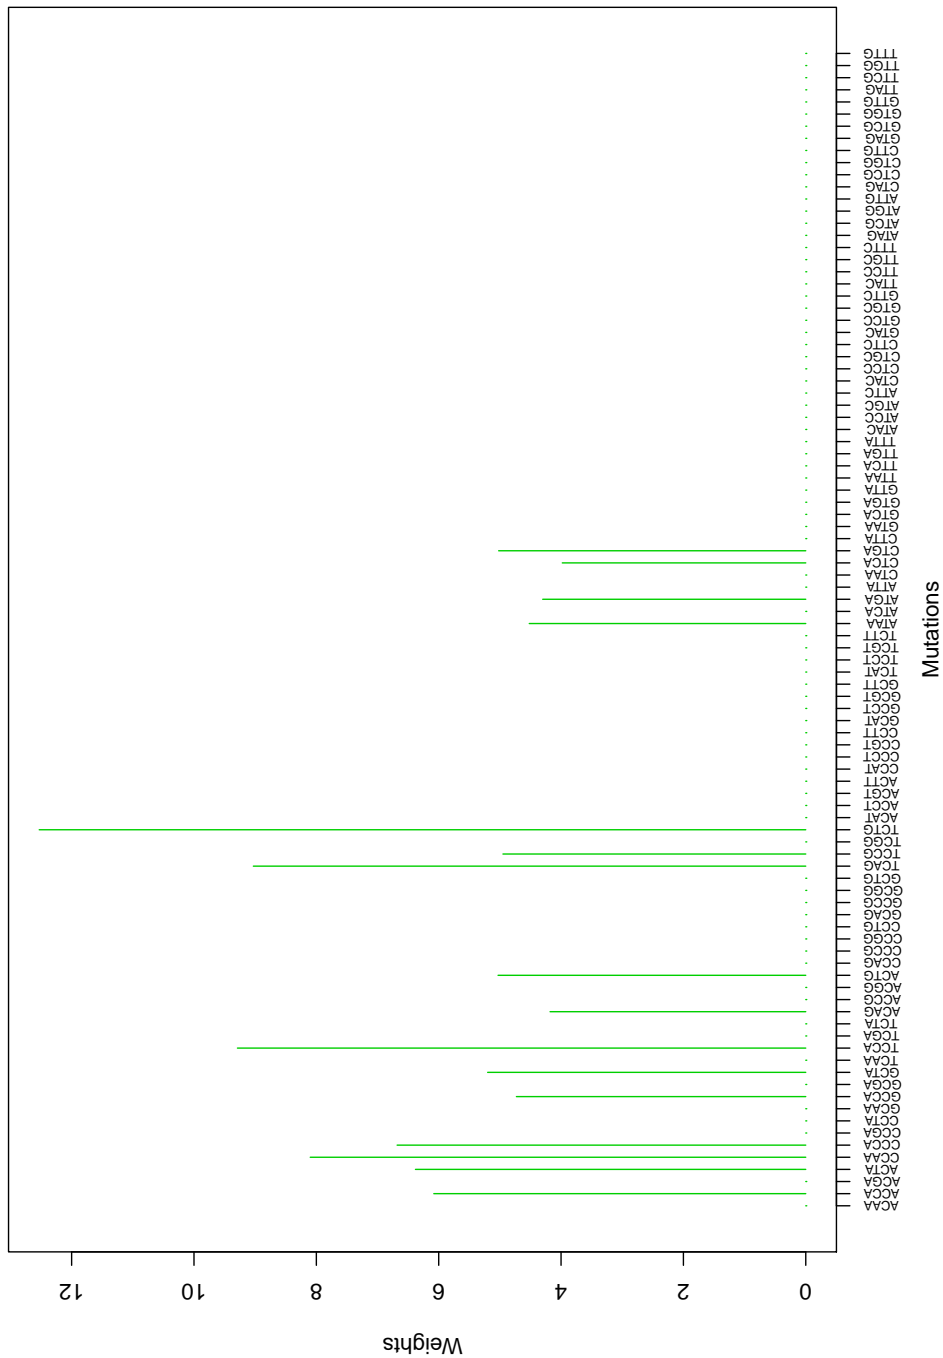

Figure S36: Cluster Cl-4 in Clustering-D with weights based on normalized regressions with arithmetic means (see Subsection 2.6). See Tables S4, S9, S10.







































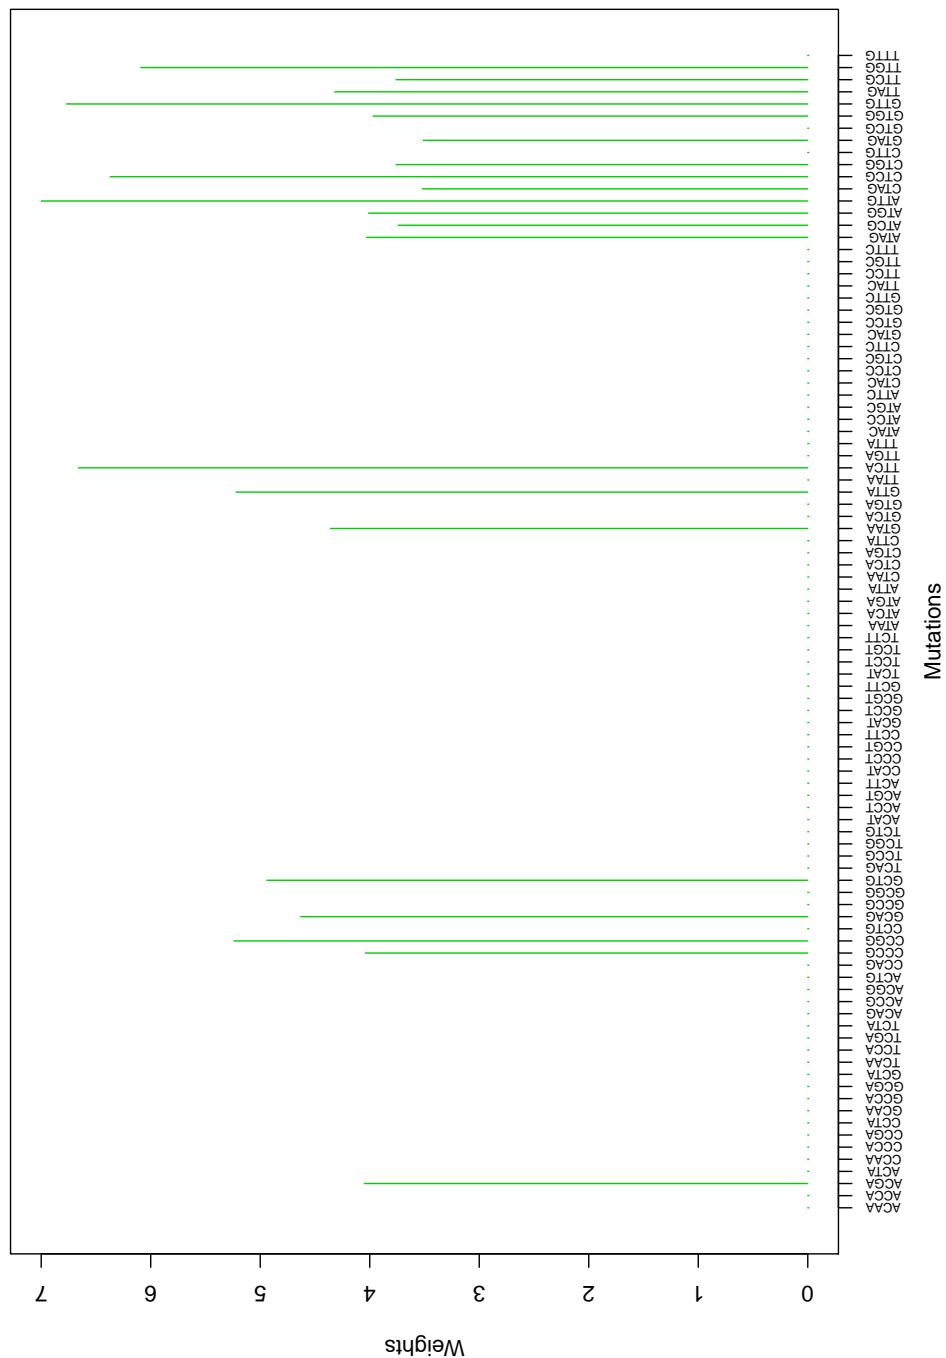

Figure S54: Cluster Cl-7 in Clustering-A with weights based on normalized regressions with geometric means (see Subsection 2.6). See Tables S4, 3, 4.
